# Supplementary material
Source: bioRxiv or medRxiv preprint supplement (https://medrxiv.org/highwire/filestream/95488/field_highwire_adjunct_files/0/2020.09.02.20185173-1.pdf)
Supplement: Supplementary file [file 2020.09.02.20185173-1.pdf]

## Supplementary material

|                                                                                                                                                                     |    |
|---------------------------------------------------------------------------------------------------------------------------------------------------------------------|----|
| Appendix 1. Description of databases                                                                                                                                | 2  |
| Appendix 2. Definitions and codes used to identify COVID-19 and seasonal influenza 2017-2018 cases                                                                  | 3  |
| Appendix 3. Definitions and codes used for obesity and other comorbidities                                                                                          | 28 |
| Appendix 4. Table 3: Percentage of obese and non-obese patients diagnosed and hospitalized with COVID-19 and influenza in the season 2017-2018 by 5-year age strata | 32 |
| Appendix 5. Table 4: Comorbidities and main outcomes among obese and non-obese patients diagnosed with COVID-19.                                                    | 37 |
| Appendix 6. Table 5: Comorbidities and main outcomes among obese and non-obese patients hospitalized with COVID-19                                                  | 39 |
| Appendix 7. Table 6: Comorbidities among obese patients with influenza during the season 2017-2018                                                                  | 41 |

## Appendix 1. Description of databases

| Institution Name               | Database                                                     | Database Description                                                                                                                                                                                                                                                                                                                                                                                                                                                                                                                                                                                                                                                                                                                                                                                                                                                                                                                                                                                                                                                   | Country        |
|--------------------------------|--------------------------------------------------------------|------------------------------------------------------------------------------------------------------------------------------------------------------------------------------------------------------------------------------------------------------------------------------------------------------------------------------------------------------------------------------------------------------------------------------------------------------------------------------------------------------------------------------------------------------------------------------------------------------------------------------------------------------------------------------------------------------------------------------------------------------------------------------------------------------------------------------------------------------------------------------------------------------------------------------------------------------------------------------------------------------------------------------------------------------------------------|----------------|
| Janssen Research & Development | The Clinical Practice Research Datalink (CPRD)               | The Clinical Practice Research Datalink (CPRD) is a governmental, not-for-profit research service, jointly funded by the NHS National Institute for Health Research (NIHR) and the Medicines and Healthcare products Regulatory Agency (MHRA), a part of the Department of Health, United Kingdom (UK). CPRD consists of data collected from UK primary care for all ages. This includes conditions, observations, measurements, and procedures that the general practitioner is made aware of in addition to any prescriptions as prescribed by the general practitioner. In addition to primary care, there are also linked secondary care records for a small number of people. The major data elements contained within this database are outpatient prescriptions given by the general practitioner (coded with Multilex codes) and outpatient clinical, referral, immunization or test events that the general practitioner knows about (coded in Read or ICD10 or LOINC codes). The database also contains the patients' year of births and any date of deaths. | United Kingdom |
| IDIAPJGol                      | The Information System for Research in Primary Care (SIDIAP) | The Information System for Research in Primary Care (SIDIAP; <a href="http://www.sidiap.org">www.sidiap.org</a> ) is a primary care records database that covers approximately 80% of the population of Catalonia, North-East Spain. Healthcare is universal and tax-payer funded in the region, and primary care physicians are gatekeepers for all care and responsible for repeat prescriptions.                                                                                                                                                                                                                                                                                                                                                                                                                                                                                                                                                                                                                                                                    | Spain          |
| Stanford                       | Stanford Medicine Research Data Repository (STARR-OMOP)      | A clinical data warehouse containing live Epic data from Stanford Health Care, the Stanford Children's Hospital, the University Healthcare Alliance and Packard Children's Health Alliance clinics.<br>Reference: Datta S, Posada J, Olson G, <i>et al.</i> A new paradigm for accelerating clinical data science at Stanford Medicine. <i>arXiv</i> 2020; published online March 17. <a href="http://arxiv.org/abs/2003.10534">http://arxiv.org/abs/2003.10534</a> (accessed Aug 20, 2020).                                                                                                                                                                                                                                                                                                                                                                                                                                                                                                                                                                           | United States  |
| Columbia                       | Columbia University Irving Medical Center (CUIMC)            | The clinical data warehouse of New York-Presbyterian Hospital/Columbia University Irving Medical Center, New York, NY, based on its current and previous electronic health record systems, with data spanning over 30 years and including over 6 million patients                                                                                                                                                                                                                                                                                                                                                                                                                                                                                                                                                                                                                                                                                                                                                                                                      | United States  |
| IQVIA                          | Open Claims                                                  | Pre-adjudicated claims covering over 300 Million lives (~80% of the US) collected from office-based physicians and specialists via office management software and clearinghouse switch sources for the purpose of reimbursement.                                                                                                                                                                                                                                                                                                                                                                                                                                                                                                                                                                                                                                                                                                                                                                                                                                       | United States  |
| Department of Veterans Affairs | V- OMOP                                                      | VA-OMOP data reflects the national Department of Veterans Affairs health care system, which is the largest integrated provider of medical and mental health services in the United States. Care is provided at 170 VA Medical Centers and 1,063 outpatient sites serving more than 9 million enrolled Veterans each year.                                                                                                                                                                                                                                                                                                                                                                                                                                                                                                                                                                                                                                                                                                                                              | United States  |

## Appendix 2. Definitions and codes used to identify COVID-19 and seasonal influenza 2017-2018 cases

The below tables summarise the concepts used to identify patients diagnosed with COVID-19 and with season influenza during the 2017-2018 season. The full description of the logic used is provided at <https://atlas.ohdsi.org/#/cohortdefinition/200> for COVID-19 and at <https://atlas.ohdsi.org/#/cohortdefinition/211> for influenza. Similarly, the full description of the logic used to identify patients hospitalized is provided at <https://atlas.ohdsi.org/#/cohortdefinition/197> for COVID-19 and at <https://atlas.ohdsi.org/#/cohortdefinition/212> for influenza.

### COVID-19 condition codes

| <b>Id</b> | <b>Name</b>                                                           | <b>Vocabulary</b> |
|-----------|-----------------------------------------------------------------------|-------------------|
| 756023    | Acute bronchitis due to COVID-19                                      | OMOP Extension    |
| 756044    | Acute respiratory distress syndrome (ARDS) due to COVID-19            | OMOP Extension    |
| 756061    | Asymptomatic COVID-19                                                 | OMOP Extension    |
| 756031    | Bronchitis due to COVID-19                                            | OMOP Extension    |
| 439676    | Coronavirus infection                                                 | SNOMED            |
| 37311061  | Disease caused by 2019-nCoV                                           | SNOMED            |
| 4100065   | Disease due to Coronaviridae                                          | SNOMED            |
| 37310284  | Encephalopathy caused by 2019 novel coronavirus                       | SNOMED            |
| 37310283  | Gastroenteritis caused by 2019 novel coronavirus                      | SNOMED            |
| 4248811   | Healthcare associated severe acute respiratory syndrome               | SNOMED            |
| 756081    | Infection of lower respiratory tract due to COVID-19                  | OMOP Extension    |
| 37310286  | Infection of upper respiratory tract caused by 2019 novel coronavirus | SNOMED            |
| 45763594  | Middle East respiratory syndrome                                      | SNOMED            |

|          |                                                                |                |
|----------|----------------------------------------------------------------|----------------|
| 37310287 | Myocarditis caused by 2019 novel coronavirus                   | SNOMED         |
| 37310254 | Otitis media caused by 2019 novel coronavirus                  | SNOMED         |
| 37310285 | Pneumonia caused by 2019 novel coronavirus                     | SNOMED         |
| 37016927 | Pneumonia caused by Human coronavirus                          | SNOMED         |
| 40479642 | Pneumonia due to Severe acute respiratory syndrome coronavirus | SNOMED         |
| 756039   | Respiratory infection due to COVID-19                          | OMOP Extension |
| 320651   | Severe acute respiratory syndrome                              | SNOMED         |
| 37396171 | Severe acute respiratory syndrome of upper respiratory tract   | SNOMED         |
| 37311060 | Suspected disease caused by 2019-nCoV                          | SNOMED         |

#### COVID-19 specific testing - Positive

| <b>Id</b> | <b>Name</b>                     | <b>Vocabulary</b> |
|-----------|---------------------------------|-------------------|
| 37310282  | 2019 novel coronavirus detected | SNOMED            |

#### COVID-19 specific testing (note, these required a corresponding value as concept of: Detected, Positive, or Present)

| <b>Id</b> | <b>Name</b>                                                                                                                                                                       | <b>Vocabulary</b> |
|-----------|-----------------------------------------------------------------------------------------------------------------------------------------------------------------------------------|-------------------|
| 37310255  | Detection of 2019 novel coronavirus using polymerase chain reaction technique                                                                                                     | SNOMED            |
| 700360    | Infectious agent detection by nucleic acid (DNA or RNA); severe acute respiratory syndrome coronavirus 2 (SARS-CoV-2) (Coronavirus disease [COVID-19]), amplified probe technique | CPT4              |
| 37310258  | Measurement of 2019 novel coronavirus antibody                                                                                                                                    | SNOMED            |

|          |                                                                                                                                                |                |
|----------|------------------------------------------------------------------------------------------------------------------------------------------------|----------------|
| 37310257 | Measurement of 2019 novel coronavirus antigen                                                                                                  | SNOMED         |
| 756055   | Measurement of Severe acute respiratory syndrome coronavirus 2 (SARS-CoV-2)                                                                    | OMOP Extension |
| 586310   | Measurement of Severe acute respiratory syndrome coronavirus 2 (SARS-CoV-2) Genetic material using Molecular method                            | OMOP Extension |
| 704991   | Measurement of Severe acute respiratory syndrome coronavirus 2 (SARS-CoV-2) in Blood                                                           | OMOP Extension |
| 756029   | Measurement of Severe acute respiratory syndrome coronavirus 2 (SARS-CoV-2) in Respiratory specimen                                            | OMOP Extension |
| 586307   | Measurement of Severe acute respiratory syndrome coronavirus 2 (SARS-CoV-2) in Saliva                                                          | OMOP Extension |
| 705107   | Measurement of Severe acute respiratory syndrome coronavirus 2 (SARS-CoV-2) in Sample from nose                                                | OMOP Extension |
| 586309   | Measurement of Severe acute respiratory syndrome coronavirus 2 (SARS-CoV-2) in Specified specimen                                              | OMOP Extension |
| 756065   | Measurement of Severe acute respiratory syndrome coronavirus 2 (SARS-CoV-2) in Unspecified specimen                                            | OMOP Extension |
| 704992   | Measurement of Severe acute respiratory syndrome coronavirus 2 (SARS-CoV-2) using Culture method                                               | OMOP Extension |
| 705001   | Measurement of Severe acute respiratory syndrome coronavirus 2 (SARS-CoV-2) using Nucleic acid amplification technique                         | OMOP Extension |
| 705000   | Measurement of Severe acute respiratory syndrome coronavirus 2 (SARS-CoV-2) using Nucleic acid amplification technique in Blood                | OMOP Extension |
| 756085   | Measurement of Severe acute respiratory syndrome coronavirus 2 (SARS-CoV-2) using Nucleic acid amplification technique in Respiratory specimen | OMOP Extension |
| 586308   | Measurement of Severe acute respiratory syndrome coronavirus 2 (SARS-CoV-2) using Nucleic acid amplification technique in Saliva               | OMOP Extension |
| 705106   | Measurement of Severe acute respiratory syndrome coronavirus 2 (SARS-CoV-2) using Nucleic acid amplification technique in Sample from nose     | OMOP Extension |
| 756084   | Measurement of Severe acute respiratory syndrome coronavirus 2 (SARS-CoV-2) using Nucleic acid amplification technique in Unspecified specimen | OMOP Extension |
| 704993   | Measurement of Severe acute respiratory syndrome coronavirus 2 (SARS-CoV-2) using Sequencing                                                   | OMOP Extension |
| 586516   | SARS-CoV-2 (COVID19) [Presence] in Unspecified specimen by Organism specific culture                                                           | LOINC          |
| 723480   | SARS-CoV-2 (COVID19) Ab [Interpretation] in Serum or Plasma                                                                                    | LOINC          |
| 586515   | SARS-CoV-2 (COVID19) Ab [Presence] in Serum or Plasma by Immunoassay                                                                           | LOINC          |

|        |                                                                                                     |       |
|--------|-----------------------------------------------------------------------------------------------------|-------|
| 586522 | SARS-CoV-2 (COVID19) Ab [Units/volume] in Serum or Plasma by Immunoassay                            | LOINC |
| 706179 | SARS-CoV-2 (COVID19) Ab panel - Serum or Plasma by Immunoassay                                      | LOINC |
| 723477 | SARS-CoV-2 (COVID19) Ag [Presence] in Respiratory specimen by Rapid immunoassay                     | LOINC |
| 706166 | SARS-CoV-2 (COVID19) E gene [Cycle Threshold #] in Unspecified specimen by NAA with probe detection | LOINC |
| 586523 | SARS-CoV-2 (COVID19) E gene [Presence] in Respiratory specimen by NAA with probe detection          | LOINC |
| 586518 | SARS-CoV-2 (COVID19) E gene [Presence] in Serum or Plasma by NAA with probe detection               | LOINC |
| 706174 | SARS-CoV-2 (COVID19) E gene [Presence] in Unspecified specimen by NAA with probe detection          | LOINC |
| 723473 | SARS-CoV-2 (COVID19) IgA Ab [Presence] in Serum or Plasma by Immunoassay                            | LOINC |
| 586521 | SARS-CoV-2 (COVID19) IgA Ab [Presence] in Serum, Plasma or Blood by Rapid immunoassay               | LOINC |
| 723459 | SARS-CoV-2 (COVID19) IgA Ab [Units/volume] in Serum or Plasma by Immunoassay                        | LOINC |
| 757686 | SARS-CoV-2 (COVID19) IgA+IgM [Presence] in Serum or Plasma by Immunoassay                           | LOINC |
| 586527 | SARS-CoV-2 (COVID19) IgG Ab [Presence] in DBS by Immunoassay                                        | LOINC |
| 723474 | SARS-CoV-2 (COVID19) IgG Ab [Presence] in Serum or Plasma by Immunoassay                            | LOINC |
| 706181 | SARS-CoV-2 (COVID19) IgG Ab [Presence] in Serum, Plasma or Blood by Rapid immunoassay               | LOINC |
| 706177 | SARS-CoV-2 (COVID19) IgG Ab [Units/volume] in Serum or Plasma by Immunoassay                        | LOINC |
| 706176 | SARS-CoV-2 (COVID19) IgG and IgM panel - Serum, Plasma or Blood by Rapid immunoassay                | LOINC |
| 723479 | SARS-CoV-2 (COVID19) IgG+IgM Ab [Presence] in Serum or Plasma by Immunoassay                        | LOINC |
| 723475 | SARS-CoV-2 (COVID19) IgM Ab [Presence] in Serum or Plasma by Immunoassay                            | LOINC |
| 706180 | SARS-CoV-2 (COVID19) IgM Ab [Presence] in Serum, Plasma or Blood by Rapid immunoassay               | LOINC |
| 706178 | SARS-CoV-2 (COVID19) IgM Ab [Units/volume] in Serum or Plasma by Immunoassay                        | LOINC |

|        |                                                                                                                                     |       |
|--------|-------------------------------------------------------------------------------------------------------------------------------------|-------|
| 706167 | SARS-CoV-2 (COVID19) N gene [Cycle Threshold #] in Unspecified specimen by NAA with probe detection                                 | LOINC |
| 706157 | SARS-CoV-2 (COVID19) N gene [Cycle Threshold #] in Unspecified specimen by Nucleic acid amplification using CDC primer-probe set N1 | LOINC |
| 706155 | SARS-CoV-2 (COVID19) N gene [Cycle Threshold #] in Unspecified specimen by Nucleic acid amplification using CDC primer-probe set N2 | LOINC |
| 715272 | SARS-CoV-2 (COVID19) N gene [Presence] in Nasopharynx by NAA with probe detection                                                   | LOINC |
| 757678 | SARS-CoV-2 (COVID19) N gene [Presence] in Nose by NAA with probe detection                                                          | LOINC |
| 706161 | SARS-CoV-2 (COVID19) N gene [Presence] in Respiratory specimen by NAA with probe detection                                          | LOINC |
| 586524 | SARS-CoV-2 (COVID19) N gene [Presence] in Respiratory specimen by Nucleic acid amplification using CDC primer-probe set N1          | LOINC |
| 586525 | SARS-CoV-2 (COVID19) N gene [Presence] in Respiratory specimen by Nucleic acid amplification using CDC primer-probe set N2          | LOINC |
| 586520 | SARS-CoV-2 (COVID19) N gene [Presence] in Serum or Plasma by NAA with probe detection                                               | LOINC |
| 706175 | SARS-CoV-2 (COVID19) N gene [Presence] in Unspecified specimen by NAA with probe detection                                          | LOINC |
| 706156 | SARS-CoV-2 (COVID19) N gene [Presence] in Unspecified specimen by Nucleic acid amplification using CDC primer-probe set N1          | LOINC |
| 706154 | SARS-CoV-2 (COVID19) N gene [Presence] in Unspecified specimen by Nucleic acid amplification using CDC primer-probe set N2          | LOINC |
| 757680 | SARS-CoV-2 (COVID19) neutralizing antibody [Presence] in Serum by pVNT                                                              | LOINC |
| 757679 | SARS-CoV-2 (COVID19) neutralizing antibody [Titer] in Serum by pVNT                                                                 | LOINC |
| 723469 | SARS-CoV-2 (COVID19) ORF1ab region [Cycle Threshold #] in Respiratory specimen by NAA with probe detection                          | LOINC |
| 706168 | SARS-CoV-2 (COVID19) ORF1ab region [Cycle Threshold #] in Unspecified specimen by NAA with probe detection                          | LOINC |
| 723478 | SARS-CoV-2 (COVID19) ORF1ab region [Presence] in Respiratory specimen by NAA with probe detection                                   | LOINC |
| 723464 | SARS-CoV-2 (COVID19) ORF1ab region [Presence] in Unspecified specimen by NAA with probe detection                                   | LOINC |
| 723471 | SARS-CoV-2 (COVID19) RdRp gene [Cycle Threshold #] in Respiratory specimen by NAA with probe detection                              | LOINC |
| 723470 | SARS-CoV-2 (COVID19) RdRp gene [Cycle Threshold #] in Unspecified specimen by NAA with probe detection                              | LOINC |

|        |                                                                                                          |       |
|--------|----------------------------------------------------------------------------------------------------------|-------|
| 706160 | SARS-CoV-2 (COVID19) RdRp gene [Presence] in Respiratory specimen by NAA with probe detection            | LOINC |
| 706173 | SARS-CoV-2 (COVID19) RdRp gene [Presence] in Unspecified specimen by NAA with probe detection            | LOINC |
| 586528 | SARS-CoV-2 (COVID19) RNA [Cycle Threshold #] in Respiratory specimen by NAA with probe detection         | LOINC |
| 586529 | SARS-CoV-2 (COVID19) RNA [Cycle Threshold #] in Unspecified specimen by NAA with probe detection         | LOINC |
| 715262 | SARS-CoV-2 (COVID19) RNA [Log #/volume] (viral load) in Unspecified specimen by NAA with probe detection | LOINC |
| 723476 | SARS-CoV-2 (COVID19) RNA [Presence] in Nasopharynx by NAA with non-probe detection                       | LOINC |
| 586526 | SARS-CoV-2 (COVID19) RNA [Presence] in Nasopharynx by NAA with probe detection                           | LOINC |
| 757677 | SARS-CoV-2 (COVID19) RNA [Presence] in Nose by NAA with probe detection                                  | LOINC |
| 706163 | SARS-CoV-2 (COVID19) RNA [Presence] in Respiratory specimen by NAA with probe detection                  | LOINC |
| 715260 | SARS-CoV-2 (COVID19) RNA [Presence] in Saliva (oral fluid) by NAA with probe detection                   | LOINC |
| 715261 | SARS-CoV-2 (COVID19) RNA [Presence] in Saliva (oral fluid) by Sequencing                                 | LOINC |
| 723463 | SARS-CoV-2 (COVID19) RNA [Presence] in Serum or Plasma by NAA with probe detection                       | LOINC |
| 706170 | SARS-CoV-2 (COVID19) RNA [Presence] in Unspecified specimen by NAA with probe detection                  | LOINC |
| 706158 | SARS-CoV-2 (COVID19) RNA panel - Respiratory specimen by NAA with probe detection                        | LOINC |
| 706169 | SARS-CoV-2 (COVID19) RNA panel - Unspecified specimen by NAA with probe detection                        | LOINC |
| 723467 | SARS-CoV-2 (COVID19) S gene [Cycle Threshold #] in Respiratory specimen by NAA with probe detection      | LOINC |
| 723468 | SARS-CoV-2 (COVID19) S gene [Cycle Threshold #] in Unspecified specimen by NAA with probe detection      | LOINC |
| 723465 | SARS-CoV-2 (COVID19) S gene [Presence] in Respiratory specimen by NAA with probe detection               | LOINC |
| 586519 | SARS-CoV-2 (COVID19) S gene [Presence] in Serum or Plasma by NAA with probe detection                    | LOINC |
| 723466 | SARS-CoV-2 (COVID19) S gene [Presence] in Unspecified specimen by NAA with probe detection               | LOINC |



|          |                                                                                  |       |
|----------|----------------------------------------------------------------------------------|-------|
| 586517   | SARS-CoV-2 (COVID19) whole genome [Nucleotide sequence] in Isolate by Sequencing | LOINC |
| 40218805 | Testing for SARS-CoV-2 in CDC laboratory                                         | HCPCS |
| 40218804 | Testing for SARS-CoV-2 in non-CDC laboratory                                     | HCPCS |

### Influenza conditions codes

| <b>Id</b> | <b>Name</b>                                             | <b>Vocabulary</b> |
|-----------|---------------------------------------------------------|-------------------|
| 46274061  | Encephalopathy due to Influenza A virus                 | SNOMED            |
| 46274030  | Gastroenteritis due to H1N1 influenza                   | SNOMED            |
| 46273463  | Upper respiratory tract infection due to Influenza      | SNOMED            |
| 46270491  | Upper respiratory tract infection due to Influenza A    | SNOMED            |
| 46270318  | Pneumonia due to influenza                              | SNOMED            |
| 46270124  | Encephalopathy due to H1N1 influenza                    | SNOMED            |
| 46270123  | Myocarditis due to Influenza A virus subtype H1N1       | SNOMED            |
| 46270122  | Upper respiratory tract infection due to H1N1 influenza | SNOMED            |
| 46270121  | Pneumonia due to H1N1 influenza                         | SNOMED            |
| 46269769  | Otitis media due to Influenza A virus                   | SNOMED            |
| 46269742  | Myocarditis due to Influenza A virus                    | SNOMED            |
| 46269741  | Bronchiolitis caused by influenza virus                 | SNOMED            |
| 46269737  | Gastroenteritis due to Influenza A virus                | SNOMED            |

|          |                                                          |        |
|----------|----------------------------------------------------------|--------|
| 46269736 | Gastroenteritis due to influenza                         | SNOMED |
| 46269706 | Otitis media due to influenza                            | SNOMED |
| 46269705 | Otitis media due to H1N1 influenza                       | SNOMED |
| 45768913 | Influenza due to Influenza A virus subtype H7N9          | SNOMED |
| 42872724 | Influenza due to Influenza A virus subtype H9            | SNOMED |
| 42872723 | Influenza due to Influenza A virus subtype H7            | SNOMED |
| 42537960 | Influenza with CNS disorder                              | SNOMED |
| 40484544 | Influenza due to Influenza A virus subtype H1N1          | SNOMED |
| 40483537 | Influenza due to Influenza A virus                       | SNOMED |
| 37394479 | Influenza with pneumonia due to seasonal influenza virus | SNOMED |
| 37394478 | Influenza due to seasonal influenza virus                | SNOMED |
| 37394477 | Influenza due to pandemic influenza virus                | SNOMED |
| 37394476 | Influenza due to zoonotic influenza virus                | SNOMED |
| 37016926 | Influenza caused by Influenza A virus subtype H5         | SNOMED |
| 36714570 | Influenza caused by pandemic influenza virus             | SNOMED |
| 36714388 | Influenza caused by seasonal influenza virus             | SNOMED |
| 36676238 | Pneumonia caused by Influenza A virus                    | SNOMED |
| 36676233 | Influenza caused by Influenza A virus subtype H5N1       | SNOMED |
| 36676221 | Influenza caused by Influenza A virus subtype H3N2       | SNOMED |
| 4304374  | Influenza due to Influenza C virus                       | SNOMED |

|         |                                                                 |        |
|---------|-----------------------------------------------------------------|--------|
| 4299935 | Myocarditis due to influenza virus                              | SNOMED |
| 4266367 | Influenza                                                       | SNOMED |
| 4252885 | Influenza with encephalopathy                                   | SNOMED |
| 4248810 | Healthcare associated influenza disease                         | SNOMED |
| 4186568 | Influenzal bronchopneumonia                                     | SNOMED |
| 4183609 | Influenzal acute upper respiratory infection                    | SNOMED |
| 4146943 | Encephalitis due to influenza                                   | SNOMED |
| 4112824 | Influenza with gastrointestinal tract involvement               | SNOMED |
| 4112664 | Influenza with laryngitis                                       | SNOMED |
| 4110512 | Influenza with pharyngitis                                      | SNOMED |
| 4108226 | Acute myocarditis - influenzal                                  | SNOMED |
| 4080680 | Influenza due to Influenza B virus                              | SNOMED |
| 765607  | Influenza due to Influenza A virus with upper respiratory signs | SNOMED |
| 763012  | Pneumonia due to Influenza A virus subtype H1N1                 | SNOMED |
| 763011  | Pneumonia due to Influenza A virus                              | SNOMED |
| 320752  | Influenza with non-respiratory manifestation                    | SNOMED |
| 256723  | Pneumonia and influenza                                         | SNOMED |

**Influenza specific testing - Positive**

| <b>Id</b> | <b>Name</b>                                               | <b>Vocabulary</b> |
|-----------|-----------------------------------------------------------|-------------------|
| 46272887  | Influenza A virus subtype H1N1 detected                   | SNOMED            |
| 45773008  | Influenza A virus subtype H9 present                      | SNOMED            |
| 45771050  | Influenza A virus subtype H7 present                      | SNOMED            |
| 45765521  | Influenza A H1N1 virus 2009 pandemic strain present       | SNOMED            |
| 45757528  | Influenza A virus present                                 | SNOMED            |
| 44783879  | Influenza A virus untyped strain present                  | SNOMED            |
| 4262075   | Influenza B virus present                                 | SNOMED            |
| 4262073   | Influenza A virus subtype H5 present                      | SNOMED            |
| 4235537   | Influenza A virus subtype H2 present                      | SNOMED            |
| 4208931   | Influenza A virus subtype H1 present                      | SNOMED            |
| 4207452   | Influenza A virus subtype H3 present                      | SNOMED            |
| 765180    | Influenza A virus subtype H5 asian strain detected        | SNOMED            |
| 761948    | Influenza A virus subtype H1 2009 pandemic strain present | SNOMED            |

**Influenza specific testing (note, these required a corresponding value as concept of: Detected, Positive, or Present)**

| <b>Id</b> | <b>Name</b>                                                                                  | <b>Vocabulary</b> |
|-----------|----------------------------------------------------------------------------------------------|-------------------|
| 46236738  | Influenza virus A H1 2009 pandemic RNA [Presence] in Nasopharynx by NAA with probe detection | LOINC             |
| 46236737  | Influenza virus A H3 RNA [Presence] in Nasopharynx by NAA with probe detection               | LOINC             |

|          |                                                                                                       |        |
|----------|-------------------------------------------------------------------------------------------------------|--------|
| 46236736 | Influenza virus A H1 RNA [Presence] in Nasopharynx by NAA with probe detection                        | LOINC  |
| 46236326 | Influenza virus A H5 icA RNA [Cycle Threshold #] in Unspecified specimen by NAA with probe detection  | LOINC  |
| 46236085 | Influenza virus B Ag [Presence] in Bronchoalveolar lavage by Immunofluorescence                       | LOINC  |
| 46235793 | Influenza virus A Ag [Presence] in Bronchoalveolar lavage by Immunofluorescence                       | LOINC  |
| 46235759 | Influenza virus B RNA [Presence] in Nasopharynx by NAA with probe detection                           | LOINC  |
| 46235758 | Influenza virus B RNA [Presence] in Bronchoalveolar lavage by NAA with probe detection                | LOINC  |
| 46235757 | Influenza virus A RNA [Presence] in Nasopharynx by NAA with probe detection                           | LOINC  |
| 46235756 | Influenza virus A RNA [Presence] in Bronchoalveolar lavage by NAA with probe detection                | LOINC  |
| 45770712 | Influenza B virus ribonucleic acid detection assay                                                    | SNOMED |
| 45770711 | Influenza A virus ribonucleic acid detection assay                                                    | SNOMED |
| 45770685 | Avian influenza virus RNA (ribonucleic acid) detection assay                                          | SNOMED |
| 44816685 | Influenza virus B Victoria and Yamagata lineage RNA panel - Unspecified specimen                      | LOINC  |
| 44816684 | Influenza virus B Yamagata lineage RNA [Presence] in Unspecified specimen by NAA with probe detection | LOINC  |
| 44816683 | Influenza virus B Victoria lineage RNA [Presence] in Unspecified specimen by NAA with probe detection | LOINC  |
| 44816682 | Influenza virus B lineage RNA [Identifier] in Unspecified specimen by NAA with probe detection        | LOINC  |
| 44811858 | Influenza B nucleic acid detection assay                                                              | SNOMED |
| 44811857 | Influenza A nucleic acid detection assay                                                              | SNOMED |
| 44811753 | Avian influenza virus nucleic acid detection assay                                                    | SNOMED |
| 44807860 | Influenza B nucleic acid detection                                                                    | SNOMED |
| 44807634 | Influenza B virus ribonucleic acid measurement by nucleic acid amplification test                     | SNOMED |

|          |                                                                                                                         |        |
|----------|-------------------------------------------------------------------------------------------------------------------------|--------|
| 44807633 | Influenza A virus ribonucleic acid measurement by nucleic acid amplification test                                       | SNOMED |
| 44806470 | Influenza A nucleic acid detection                                                                                      | SNOMED |
| 44789502 | Avian infl virus nucl acid det                                                                                          | SNOMED |
| 44786697 | Influenza virus A N2 RNA [Cycle Threshold #] in Unspecified specimen by NAA with probe detection                        | LOINC  |
| 44786696 | Influenza virus A H3 RNA [Cycle Threshold #] in Unspecified specimen by NAA with probe detection                        | LOINC  |
| 44786695 | Influenza virus A H1 RNA [Cycle Threshold #] in Unspecified specimen by NAA with probe detection                        | LOINC  |
| 43055601 | Influenza virus A hemagglutinin segment sequence identifier                                                             | LOINC  |
| 43054998 | Influenza virus A+B Ag [Presence] in Nose by Rapid immunoassay                                                          | LOINC  |
| 43054997 | Influenza virus A and B Ag [Identifier] in Nose by Rapid immunoassay                                                    | LOINC  |
| 43054996 | Influenza virus A and B Ag [Identifier] in Nose by Immunofluorescence                                                   | LOINC  |
| 43054990 | Influenza virus A and B Ag [Identifier] in Unspecified specimen by Rapid immunoassay                                    | LOINC  |
| 43054944 | Influenza virus A matrix protein segment sequence identifier                                                            | LOINC  |
| 43054943 | Influenza virus A neuraminidase segment sequence identifier                                                             | LOINC  |
| 42528606 | Influenza virus A and B and H1 2009 pandemic RNA [Identifier] in Upper respiratory specimen by NAA with probe detection | LOINC  |
| 40771513 | Influenza virus A H5b RNA [Presence] in Unspecified specimen by NAA with probe detection                                | LOINC  |
| 40771512 | Influenza virus A H5a RNA [Presence] in Unspecified specimen by NAA with probe detection                                | LOINC  |
| 40765592 | Influenza virus C RNA [Presence] in Unspecified specimen by NAA with probe detection                                    | LOINC  |
| 40765199 | Influenza virus A+B RNA [Presence] in Unspecified specimen by NAA with probe detection                                  | LOINC  |
| 40763863 | Influenza virus A and B Ag [Identifier] in Unspecified specimen by Immunofluorescence                                   | LOINC  |
| 40763862 | Influenza virus A neuraminidase RNA [Type] in Unspecified specimen by Sequencing                                        | LOINC  |

|          |                                                                                                                                                            |       |
|----------|------------------------------------------------------------------------------------------------------------------------------------------------------------|-------|
| 40763592 | Influenza virus A H1+H3+B RNA [Presence] in Unspecified specimen by NAA with probe detection                                                               | LOINC |
| 40763584 | Influenza virus A H9 RNA [Presence] in Isolate by NAA with probe detection                                                                                 | LOINC |
| 40763548 | Influenza virus A H1 2009 pandemic and Influenza virus A swine origin RNA [Interpretation] in Unspecified specimen Qualitative by NAA with probe detection | LOINC |
| 40763322 | Influenza virus C RNA [Presence] in Isolate by NAA with probe detection                                                                                    | LOINC |
| 40762515 | Influenza virus A hemagglutinin type RNA [Identifier] in Isolate by NAA with probe detection                                                               | LOINC |
| 40762514 | Influenza virus A hemagglutinin type RNA [Identifier] in Unspecified specimen by NAA with probe detection                                                  | LOINC |
| 40761091 | Influenza virus A H2 RNA [Presence] in Unspecified specimen by NAA with probe detection                                                                    | LOINC |
| 40761006 | Influenza virus A+B.neuraminidase inhibitor resistance [Susceptibility] in Unspecified specimen by Genotype method                                         | LOINC |
| 40761005 | Influenza virus A 2009 H1N1v.neuraminidase inhibitor resistance [Susceptibility] in Unspecified specimen by Genotype method                                | LOINC |
| 40761004 | Influenza virus A H1.neuraminidase inhibitor resistance [Susceptibility] in Unspecified specimen by Genotype method                                        | LOINC |
| 40759145 | Influenza virus A N1 RNA [Units/volume] (viral load) in Unspecified specimen by NAA with probe detection                                                   | LOINC |
| 40758595 | Influenza virus A H1 2009 pandemic RNA panel - Unspecified specimen by NAA with probe detection                                                            | LOINC |
| 40758594 | Influenza virus A H1 2009 pandemic RNA [Presence] in Unspecified specimen by NAA with probe detection                                                      | LOINC |
| 40758593 | Influenza virus A swine origin RNA [Presence] in Unspecified specimen by NAA with probe detection                                                          | LOINC |
| 40758592 | Influenza virus A swine origin RNA [Identifier] in Unspecified specimen by NAA with probe detection                                                        | LOINC |
| 40758263 | Influenza virus A hemagglutinin cDNA [Identifier] in Isolate by NAA with probe detection                                                                   | LOINC |
| 40757375 | Influenza virus identified in Unspecified specimen                                                                                                         | LOINC |
| 40757374 | Influenza virus RNA [Identifier] in Unspecified specimen by Probe                                                                                          | LOINC |
| 40757373 | Influenza virus identified in Isolate                                                                                                                      | LOINC |

|          |                                                                                                                                                                                                                                                                |       |
|----------|----------------------------------------------------------------------------------------------------------------------------------------------------------------------------------------------------------------------------------------------------------------|-------|
| 40757372 | Influenza virus B Ag [Presence] in Isolate                                                                                                                                                                                                                     | LOINC |
| 40757371 | Influenza virus Ag [Presence] in Unspecified specimen                                                                                                                                                                                                          | LOINC |
| 40757077 | Infectious agent detection by nucleic acid (DNA or RNA); influenza virus, for multiple types or sub-types, includes multiplex reverse transcription, when performed, and multiplex amplified probe technique, first 2 types or sub-types                       | CPT4  |
| 40756926 | Infectious agent detection by nucleic acid (DNA or RNA); influenza virus, for multiple types or sub-types, includes multiplex reverse transcription, when performed, and multiplex amplified probe technique, each additional influenza virus type or sub-type | CPT4  |
| 40756898 | Infectious agent detection by nucleic acid (DNA or RNA); influenza virus, includes reverse transcription, when performed, and amplified probe technique, each type or subtype                                                                                  | CPT4  |
| 40655691 | Influenza virus identified Prid Sys:ANYResp                                                                                                                                                                                                                    | LOINC |
| 40655690 | Influenza virus B RNA PrThr Sys:ANYResp                                                                                                                                                                                                                        | LOINC |
| 40655689 | Influenza virus B Ag PrThr Sys:ANYResp                                                                                                                                                                                                                         | LOINC |
| 40655688 | Influenza virus A+B+C Ag PrThr Sys:ANYResp                                                                                                                                                                                                                     | LOINC |
| 40655687 | Influenza virus A+B Ag PrThr Sys:ANYResp                                                                                                                                                                                                                       | LOINC |
| 40655686 | Influenza virus A RNA PrThr Sys:ANYResp                                                                                                                                                                                                                        | LOINC |
| 40655685 | Influenza virus A H5 Asian RNA ThreshNum Sys:ANYResp                                                                                                                                                                                                           | LOINC |
| 40655684 | Influenza virus A H3 RNA PrThr Sys:ANYResp                                                                                                                                                                                                                     | LOINC |
| 40655683 | Influenza virus A H1 RNA PrThr Sys:ANYResp                                                                                                                                                                                                                     | LOINC |
| 40655682 | Influenza virus A H1 2009 pandemic RNA PrThr Sys:ANYResp                                                                                                                                                                                                       | LOINC |
| 40655681 | Influenza virus A Ag PrThr Sys:ANYResp                                                                                                                                                                                                                         | LOINC |
| 40655680 | Influenza virus A & B Ag Prid Sys:ANYResp                                                                                                                                                                                                                      | LOINC |
| 40653953 | Influenza virus                                                                                                                                                                                                                                                | LOINC |



|          |                                                                                                  |        |
|----------|--------------------------------------------------------------------------------------------------|--------|
| 40484560 | Measurement of Influenza A virus subtype H1N1 antigen                                            | SNOMED |
| 40483371 | Detection of Influenza A virus subtype H1N1 using polymerase chain reaction technique            | SNOMED |
| 37394408 | Avian influenza virus nucleic acid detection assay                                               | SNOMED |
| 37394300 | Influenza B nucleic acid detection assay                                                         | SNOMED |
| 37394297 | Influenza A nucleic acid detection assay                                                         | SNOMED |
| 37392948 | Avian influenza virus RNA (ribonucleic acid) detection assay                                     | SNOMED |
| 37392762 | Influenza A virus ribonucleic acid detection assay                                               | SNOMED |
| 37392761 | Influenza B virus ribonucleic acid detection assay                                               | SNOMED |
| 37392224 | Influenza B antigen level                                                                        | SNOMED |
| 37392223 | Influenza A antigen level                                                                        | SNOMED |
| 37080282 | Influenza virus A subtype Prid Sys:ANYResp                                                       | LOINC  |
| 37021392 | Influenza virus A H3 RNA [Presence] in Upper respiratory specimen by NAA with probe detection    | LOINC  |
| 37021252 | Influenza virus B RNA [Presence] in Respiratory specimen by NAA with probe detection             | LOINC  |
| 37021109 | Influenza virus B RNA [Presence] in Lower respiratory specimen by NAA with non-probe detection   | LOINC  |
| 37021091 | Influenza virus identified in Upper respiratory specimen by Organism specific culture            | LOINC  |
| 37020995 | Influenza virus A RNA [Presence] in Lower respiratory specimen by NAA with non-probe detection   | LOINC  |
| 37020635 | Influenza virus A RNA [Presence] in Respiratory specimen by NAA with probe detection             | LOINC  |
| 37020237 | Influenza virus A subtype [Identifier] in Upper respiratory specimen by NAA with probe detection | LOINC  |
| 37020197 | Influenza virus A H1 RNA [Presence] in Upper respiratory specimen by NAA with probe detection    | LOINC  |
| 37020181 | Influenza virus types A and B panel - Upper respiratory specimen by NAA with probe detection     | LOINC  |

|          |                                                                                                            |        |
|----------|------------------------------------------------------------------------------------------------------------|--------|
| 36676235 | Detection of Influenza A virus using PCR - polymerase chain reaction technique                             | SNOMED |
| 36306048 | Influenza virus A M gene [Nucleotide sequence] in Isolate by Sequencing                                    | LOINC  |
| 36305961 | Influenza virus A HA gene [Nucleotide sequence] in Isolate by Sequencing                                   | LOINC  |
| 36305960 | Influenza virus B Ag [Presence] in Tissue by Immunofluorescence                                            | LOINC  |
| 36305766 | Influenza virus B RNA [Presence] in Pericardial fluid by NAA with probe detection                          | LOINC  |
| 36305753 | Influenza virus A subtype [Identifier] in Cornea or Conjunctiva by NAA with probe detection                | LOINC  |
| 36305662 | Influenza virus A RNA [Presence] in Lower respiratory specimen by NAA with probe detection                 | LOINC  |
| 36304962 | Influenza virus A RNA [Presence] in Cornea or Conjunctiva by NAA with probe detection                      | LOINC  |
| 36304919 | Influenza virus B RNA [Presence] in Lower respiratory specimen by NAA with probe detection                 | LOINC  |
| 36304868 | Influenza virus A Ag [Presence] in Lower respiratory specimen by Immunofluorescence                        | LOINC  |
| 36304442 | Influenza virus A NA gene [Nucleotide sequence] in Isolate by Sequencing                                   | LOINC  |
| 36304096 | Influenza virus types A and B panel - Lower respiratory specimen by NAA with probe detection               | LOINC  |
| 36303956 | Influenza virus identified in Lower respiratory specimen by Organism specific culture                      | LOINC  |
| 36303847 | Influenza virus B RNA [Presence] in Cornea or Conjunctiva by NAA with probe detection                      | LOINC  |
| 36303833 | Influenza virus A RNA [Presence] in Pericardial fluid by NAA with probe detection                          | LOINC  |
| 36303610 | Influenza virus A swine origin RNA [Cycle Threshold #] in Unspecified specimen by NAA with probe detection | LOINC  |
| 36303582 | Influenza virus B Ag [Presence] in Lower respiratory specimen by Immunofluorescence                        | LOINC  |
| 36303537 | Influenza virus identified in Cornea or Conjunctiva by Organism specific culture                           | LOINC  |
| 36204262 | Influenza virus B RNA [Presence] in Tissue by NAA with probe detection                                     | LOINC  |
| 36204261 | Influenza virus B RNA [Presence] in Cerebral spinal fluid by NAA with probe detection                      | LOINC  |

|          |                                                                                                                            |       |
|----------|----------------------------------------------------------------------------------------------------------------------------|-------|
| 36204259 | Influenza virus A RNA [Presence] in Tissue by NAA with probe detection                                                     | LOINC |
| 36204258 | Influenza virus A RNA [Presence] in Cerebral spinal fluid by NAA with probe detection                                      | LOINC |
| 36204255 | Influenza virus A Ag [Presence] in Tissue by Immunofluorescence                                                            | LOINC |
| 36203943 | Influenza virus B Yamagata lineage Ag [Presence] in Isolate by Hemagglutination inhibition                                 | LOINC |
| 36203942 | Influenza virus A H1 2009 pandemic RNA [Cycle Threshold #] in Unspecified specimen by NAA with probe detection             | LOINC |
| 36203621 | Influenza virus B Victoria lineage Ag [Presence] in Isolate by Hemagglutination inhibition                                 | LOINC |
| 36203605 | Influenza virus A H7 Ag [Titer] in Isolate by Hemagglutination inhibition                                                  | LOINC |
| 36203604 | Influenza virus A H5 Ag [Titer] in Isolate by Hemagglutination inhibition                                                  | LOINC |
| 36203603 | Influenza virus A H3 Ag [Titer] in Isolate by Hemagglutination inhibition                                                  | LOINC |
| 36203602 | Influenza virus A H1 Ag [Titer] in Isolate by Hemagglutination inhibition                                                  | LOINC |
| 36203601 | Influenza virus B Yamagata lineage Ag [Titer] in Isolate by Hemagglutination inhibition                                    | LOINC |
| 36203379 | Influenza virus A RNA TCID50 [#]/volume] in Unspecified specimen                                                           | LOINC |
| 36203376 | Influenza virus A whole genome [Nucleotide sequence] in Isolate by Sequencing                                              | LOINC |
| 36203370 | Influenza virus D PB2 gene [Cycle Threshold #] in Unspecified specimen by NAA with probe detection                         | LOINC |
| 36203323 | Respiratory syncytial virus RNA [Presence] in Upper respiratory specimen by NAA with probe detection                       | LOINC |
| 36203322 | Influenza virus B RNA [Presence] in Upper respiratory specimen by NAA with probe detection                                 | LOINC |
| 36203321 | Influenza virus A RNA [Presence] in Upper respiratory specimen by NAA with probe detection                                 | LOINC |
| 36203320 | Influenza virus A and B and Respiratory syncytial virus RNA panel - Upper respiratory specimen by NAA with probe detection | LOINC |
| 21495067 | Influenza virus B RNA [Cycle Threshold #] in Respiratory specimen by NAA with probe detection                              | LOINC |
| 21495066 | Influenza virus A RNA [Cycle Threshold #] in Respiratory specimen by NAA with probe detection                              | LOINC |

|          |                                                                                                                |       |
|----------|----------------------------------------------------------------------------------------------------------------|-------|
| 21495065 | Influenza virus A H7 Eurasia RNA [Cycle Threshold #] in Respiratory specimen by NAA with probe detection       | LOINC |
| 21495063 | Influenza virus A H1 2009 pandemic RNA [Cycle Threshold #] in Respiratory specimen by NAA with probe detection | LOINC |
| 21494892 | Influenza virus types A and B and subtypes panel - Respiratory specimen                                        | LOINC |
| 21494796 | Influenza virus A and B identified in Nasopharynx by Shell vial culture                                        | LOINC |
| 21493425 | Influenza virus A H7 Eurasia RNA [Presence] in Respiratory specimen by NAA with probe detection                | LOINC |
| 21493378 | Influenza virus B NS gene [Presence] in Nasopharynx by NAA with probe detection                                | LOINC |
| 21493377 | Influenza virus A H3 HA gene [Presence] in Nasopharynx by NAA with probe detection                             | LOINC |
| 21493376 | Influenza virus A H1 HA gene [Presence] in Nasopharynx by NAA with probe detection                             | LOINC |
| 21493375 | Influenza virus A M gene [Presence] in Nasopharynx by NAA with probe detection                                 | LOINC |
| 21493336 | Influenza virus B RNA [Presence] in Nasopharynx by NAA with non-probe detection                                | LOINC |
| 21493335 | Influenza virus A H3 RNA [Presence] in Nasopharynx by NAA with non-probe detection                             | LOINC |
| 21493334 | Influenza virus A H1 2009 pandemic RNA [Presence] in Nasopharynx by NAA with non-probe detection               | LOINC |
| 21493333 | Influenza virus A H1 RNA [Presence] in Nasopharynx by NAA with non-probe detection                             | LOINC |
| 21493332 | Influenza virus A RNA [Presence] in Nasopharynx by NAA with non-probe detection                                | LOINC |
| 21492989 | Influenza virus B Ag [Presence] in Nasopharynx by Rapid immunoassay                                            | LOINC |
| 21492988 | Influenza virus A Ag [Presence] in Nasopharynx by Rapid immunoassay                                            | LOINC |
| 21492987 | Influenza virus A and B Ag panel - Nasopharynx by Rapid immunoassay                                            | LOINC |
| 21492891 | Influenza virus B Victoria lineage RNA [Cycle Threshold #] in Respiratory specimen by NAA with probe detection | LOINC |
| 21492890 | Human RNase P RNA [Cycle Threshold #] in Respiratory specimen by NAA with probe detection                      | LOINC |
| 21492889 | Influenza virus B Yamagata lineage RNA [Cycle Threshold #] in Respiratory specimen by NAA with probe detection | LOINC |

|          |                                                                                                                                     |        |
|----------|-------------------------------------------------------------------------------------------------------------------------------------|--------|
| 21492885 | Influenza virus A H5 Asian RNA [Cycle Threshold #] in Respiratory specimen by Nucleic acid amplification using primer-probe set H5b | LOINC  |
| 21492884 | Influenza virus A H5 Asian RNA [Cycle Threshold #] in Respiratory specimen by Nucleic acid amplification using primer-probe set H5a | LOINC  |
| 4047171  | Influenza virus culture                                                                                                             | SNOMED |
| 4044988  | Influenza B virus antigen assay                                                                                                     | SNOMED |
| 4044987  | Influenza A virus antigen assay                                                                                                     | SNOMED |
| 4039358  | Influenza A, B, and C virus antigen assay                                                                                           | SNOMED |
| 4039357  | Influenza A and B virus antigen assay                                                                                               | SNOMED |
| 3049508  | Influenza virus A and B identified in Unspecified specimen by Bioassay                                                              | LOINC  |
| 3048858  | Influenza virus A [Presence] in Unspecified specimen by Organism specific culture                                                   | LOINC  |
| 3048627  | Influenza virus B [Presence] in Unspecified specimen by Organism specific culture                                                   | LOINC  |
| 3048504  | Influenza virus A and B RNA [Identifier] in Unspecified specimen by NAA with probe detection                                        | LOINC  |
| 3047713  | Influenza virus A cDNA [Presence] in Unspecified specimen by NAA with probe detection                                               | LOINC  |
| 3047276  | Influenza virus A Ag [Presence] in Bronchial specimen                                                                               | LOINC  |
| 3047225  | Influenza virus A Ag [Presence] in Nose by Immunoassay                                                                              | LOINC  |
| 3047040  | Influenza virus A H5 Asian RNA [Presence] in Unspecified specimen by NAA with probe detection                                       | LOINC  |
| 3046999  | Influenza virus A H5 RNA [Units/volume] (viral load) in Unspecified specimen by NAA with probe detection                            | LOINC  |
| 3046850  | Influenza virus A RNA [Units/volume] (viral load) in Unspecified specimen by NAA with probe detection                               | LOINC  |
| 3046769  | Influenza virus B Ag [Presence] in Nasopharynx by Immunofluorescence                                                                | LOINC  |
| 3046524  | Influenza virus A Ag [Presence] in Nasopharynx by Immunoassay                                                                       | LOINC  |
| 3046445  | Influenza virus B Ag [Presence] in Nose by Immunofluorescence                                                                       | LOINC  |

|         |                                                                                                          |       |
|---------|----------------------------------------------------------------------------------------------------------|-------|
| 3046387 | Influenza virus A H7 RNA [Units/volume] (viral load) in Unspecified specimen by NAA with probe detection | LOINC |
| 3046253 | Influenza virus B Ag [Presence] in Nose by Immunoassay                                                   | LOINC |
| 3046105 | Influenza virus A Ag [Presence] in Trachea by Immunofluorescence                                         | LOINC |
| 3045936 | Influenza virus A Ag [Presence] in Nasopharynx by Immunofluorescence                                     | LOINC |
| 3045856 | Influenza virus B Ag [Presence] in Nose                                                                  | LOINC |
| 3045831 | Influenza virus B Ag [Presence] in Nasopharynx                                                           | LOINC |
| 3045609 | Influenza virus A+B Ag [Presence] in Bronchial specimen                                                  | LOINC |
| 3044938 | Influenza virus A RNA [Presence] in Unspecified specimen by NAA with probe detection                     | LOINC |
| 3044524 | Influenza virus A neuraminidase cDNA [Identifier] in Unspecified specimen by NAA with probe detection    | LOINC |
| 3044408 | Influenza virus A+B Ag [Presence] in Nose                                                                | LOINC |
| 3044170 | Influenza virus A H6 RNA [Units/volume] (viral load) in Unspecified specimen by NAA with probe detection | LOINC |
| 3044141 | Influenza virus A Ag [Presence] in Nasopharynx                                                           | LOINC |
| 3044123 | Influenza virus A Ag [Presence] in Nose by Immunofluorescence                                            | LOINC |
| 3043891 | Influenza virus A Ag [Presence] in Nose                                                                  | LOINC |
| 3043362 | Influenza virus B Ag [Presence] in Nasopharynx by Immunoassay                                            | LOINC |
| 3043038 | Influenza virus B Ag [Presence] in Bronchial specimen                                                    | LOINC |
| 3042913 | Influenza virus B Ag [Presence] in Trachea by Immunofluorescence                                         | LOINC |
| 3042763 | Influenza virus A Ag [Presence] in Bronchial specimen by Immunofluorescence                              | LOINC |
| 3042756 | Influenza virus B Ag [Presence] in Bronchial specimen by Immunofluorescence                              | LOINC |
| 3042355 | Influenza virus A hemagglutinin cDNA [Identifier] in Unspecified specimen by NAA with probe detection    | LOINC |

|         |                                                                                                            |       |
|---------|------------------------------------------------------------------------------------------------------------|-------|
| 3042219 | Influenza virus A RNA [#/ <i>volume</i> ] (viral load) in Unspecified specimen by NAA with probe detection | LOINC |
| 3041200 | Influenza virus A hemagglutinin cDNA [Identifier] in Unspecified specimen by Sequencing                    | LOINC |
| 3039888 | Influenza virus B RNA [#/ <i>volume</i> ] (viral load) in Unspecified specimen by NAA with probe detection | LOINC |
| 3038288 | Influenza virus B RNA [Presence] in Unspecified specimen by NAA with probe detection                       | LOINC |
| 3038149 | Equine influenza virus A2 Ag [Titer] in Unspecified specimen by Hemagglutination inhibition                | LOINC |
| 3036725 | Influenza virus A H7 RNA [Presence] in Unspecified specimen by NAA with probe detection                    | LOINC |
| 3036420 | Influenza virus A H6 RNA [Presence] in Unspecified specimen by NAA with probe detection                    | LOINC |
| 3036107 | Influenza virus A H5 RNA [Presence] in Unspecified specimen by NAA with probe detection                    | LOINC |
| 3036018 | Influenza virus A subtype [Identifier] in Unspecified specimen by Immune diffusion (ID)                    | LOINC |
| 3033066 | Influenza virus A and B RNA [Identifier] in Isolate by NAA with probe detection                            | LOINC |
| 3033040 | Influenza virus identified in Unspecified specimen by Shell vial culture                                   | LOINC |
| 3033032 | Influenza virus A.adamantane resistance [Presence] by Phenotype method                                     | LOINC |
| 3032966 | Influenza virus A Ag [Presence] in Isolate by Immunofluorescence                                           | LOINC |
| 3032788 | Influenza virus A H9 RNA [Presence] in Unspecified specimen by NAA with probe detection                    | LOINC |
| 3032731 | Influenza virus A H3 RNA [Presence] in Unspecified specimen by NAA with probe detection                    | LOINC |
| 3032475 | Influenza virus A RNA [Presence] in Isolate by NAA with probe detection                                    | LOINC |
| 3032391 | Influenza virus A.adamantane resistant RNA [Presence] by NAA with probe detection                          | LOINC |
| 3032221 | Influenza virus A H5 RNA [Presence] in Isolate by NAA with probe detection                                 | LOINC |
| 3032213 | Influenza virus A.adamantane resistance [Presence]                                                         | LOINC |
| 3031919 | Influenza virus A H3 RNA [Presence] in Isolate by NAA with probe detection                                 | LOINC |

|         |                                                                                                       |       |
|---------|-------------------------------------------------------------------------------------------------------|-------|
| 3031905 | Influenza virus A H1 RNA [Presence] in Isolate by NAA with probe detection                            | LOINC |
| 3030825 | Influenza virus susceptibility panel                                                                  | LOINC |
| 3030438 | Influenza virus B Ag [Presence] in Isolate by Immunofluorescence                                      | LOINC |
| 3030160 | Influenza virus.neuraminidase inhibitor resistance [Susceptibility] by Genotype method                | LOINC |
| 3030134 | Influenza virus B RNA [Presence] in Isolate by NAA with probe detection                               | LOINC |
| 3030120 | Influenza virus A H1 RNA [Presence] in Unspecified specimen by NAA with probe detection               | LOINC |
| 3029894 | Influenza virus A.neuraminidase inhibitor resistance [Susceptibility] Qualitative by Phenotype method | LOINC |
| 3029698 | Influenza virus.neuraminidase inhibitor resistance [Susceptibility] Qualitative                       | LOINC |
| 3029458 | Influenza virus A+B Ag [Presence] in Nasopharynx                                                      | LOINC |
| 3029215 | Influenza virus A H1 Ag [Presence] in Isolate by Immunofluorescence                                   | LOINC |
| 3029009 | Influenza virus A H3 Ag [Presence] in Isolate by Immunofluorescence                                   | LOINC |
| 3028969 | Influenza virus A Ag [Identifier] in Isolate                                                          | LOINC |
| 3028957 | Influenza virus A H7 RNA [Presence] in Isolate by NAA with probe detection                            | LOINC |
| 3028459 | Influenza virus A Ag [Presence] in Unspecified specimen by Immunoassay                                | LOINC |
| 3028162 | Influenza virus A Ag [Presence] in Throat by Immunofluorescence                                       | LOINC |
| 3027335 | Influenza virus A+B+C Ag [Presence] in Unspecified specimen by Immunofluorescence                     | LOINC |
| 3026784 | Influenza virus A Ag [Presence] in Throat by Immunoassay                                              | LOINC |
| 3026753 | Influenza virus A+B Ag [Presence] in Throat by Immunofluorescence                                     | LOINC |
| 3026290 | Influenza virus A+B+C Ag [Presence] in Throat by Immunofluorescence                                   | LOINC |
| 3024940 | Influenza virus B Ag [Presence] in Throat by Immunoassay                                              | LOINC |



|         |                                                                                            |       |
|---------|--------------------------------------------------------------------------------------------|-------|
| 3024891 | Influenza virus A+B Ag [Presence] in Unspecified specimen                                  | LOINC |
| 3024400 | Influenza virus A Ag [Presence] in Unspecified specimen by Immunofluorescence              | LOINC |
| 3023788 | Influenza virus identified in Unspecified specimen by Organism specific culture            | LOINC |
| 3023444 | Influenza virus A+B+C Ag [Presence] in Unspecified specimen                                | LOINC |
| 3023210 | Influenza virus A+B+C Ag [Presence] in Throat                                              | LOINC |
| 3023193 | Influenza virus identified in Throat by Organism specific culture                          | LOINC |
| 3022226 | Influenza virus identified in Sputum tracheal aspirate by Organism specific culture        | LOINC |
| 3022193 | Influenza virus A+B Ag [Presence] in Throat                                                | LOINC |
| 3020370 | Equine influenza virus Ag [Presence] in Nose by Immunoassay                                | LOINC |
| 3020346 | Influenza virus A subtype [Identifier] in Unspecified specimen by NAA with probe detection | LOINC |
| 3018941 | Influenza virus identified in Sputum by Organism specific culture                          | LOINC |
| 3017256 | Equine influenza virus Ag [Presence] in Nose                                               | LOINC |
| 3016676 | Equine influenza virus A2 Ag [Units/volume] in Unspecified specimen                        | LOINC |
| 3016424 | Equine influenza virus A1 Ag [Units/volume] in Unspecified specimen                        | LOINC |
| 3013704 | Influenza virus B Ag [Presence] in Unspecified specimen by Immunofluorescence              | LOINC |
| 3012817 | Influenza virus A+B+C Ag [Presence] in Unspecified specimen by Immunoassay                 | LOINC |
| 3012646 | Influenza virus A+B Ag [Presence] in Unspecified specimen by Immunoassay                   | LOINC |
| 3011852 | Influenza virus A+B Ag [Presence] in Throat by Immunoassay                                 | LOINC |
| 3011688 | Influenza virus B Ag [Presence] in Unspecified specimen by Immunoassay                     | LOINC |
| 3010845 | Influenza virus B Ag [Presence] in Throat by Immunofluorescence                            | LOINC |

|         |                                                                                                                                                                                                                                                             |       |
|---------|-------------------------------------------------------------------------------------------------------------------------------------------------------------------------------------------------------------------------------------------------------------|-------|
| 3010601 | Influenza virus A+B+C Ag [Presence] in Throat by Immunoassay                                                                                                                                                                                                | LOINC |
| 3010064 | Influenza virus A+B Ag [Presence] in Unspecified specimen by Immunofluorescence                                                                                                                                                                             | LOINC |
| 3003740 | Influenza virus B Ag [Presence] in Unspecified specimen                                                                                                                                                                                                     | LOINC |
| 3003682 | Swine influenza virus Ag [Presence] in Tissue by Immunofluorescence                                                                                                                                                                                         | LOINC |
| 3003551 | Influenza virus A Ag [Presence] in Throat                                                                                                                                                                                                                   | LOINC |
| 3002988 | Porcine influenza virus A Ag [Presence] in Tissue by Immune stain                                                                                                                                                                                           | LOINC |
| 3002707 | Influenza virus C Ag [Presence] in Unspecified specimen                                                                                                                                                                                                     | LOINC |
| 3002646 | Swine influenza virus Ag [Presence] in Tissue by Immune stain                                                                                                                                                                                               | LOINC |
| 3002601 | Influenza virus A Ag [Presence] in Unspecified specimen by Immune diffusion (ID)                                                                                                                                                                            | LOINC |
| 3002523 | Influenza virus A Ag [Presence] in Unspecified specimen                                                                                                                                                                                                     | LOINC |
| 3001703 | Equine influenza virus A1 Ag [Titer] in Unspecified specimen by Hemagglutination inhibition                                                                                                                                                                 | LOINC |
| 3001664 | Influenza virus C Ag [Presence] in Unspecified specimen by Immunofluorescence                                                                                                                                                                               | LOINC |
| 3001507 | Influenza virus A identified in Unspecified specimen by Bioassay                                                                                                                                                                                            | LOINC |
| 3000251 | Influenza virus B Ag [Presence] in Throat                                                                                                                                                                                                                   | LOINC |
| 2213181 | Infectious agent antigen detection by immunoassay with direct optical observation; Influenza                                                                                                                                                                | CPT4  |
| 2213094 | Infectious agent antigen detection by immunoassay technique, (eg, enzyme immunoassay [EIA], enzyme-linked immunosorbent assay [ELISA], immunochemiluminometric assay [IMCA]) qualitative or semiquantitative, multiple-step method; Influenza, A or B, each | CPT4  |
| 2213063 | Infectious agent antigen detection by immunofluorescent technique; influenza A virus                                                                                                                                                                        | CPT4  |
| 2213062 | Infectious agent antigen detection by immunofluorescent technique; influenza B virus                                                                                                                                                                        | CPT4  |
| 1176332 | Influenza virus types A and B panel - Cornea or Conjunctiva by NAA with probe detection                                                                                                                                                                     | LOINC |

|         |                                                                                                  |       |
|---------|--------------------------------------------------------------------------------------------------|-------|
| 1176198 | Influenza virus types A and B panel - Cerebral spinal fluid by NAA with probe detection          | LOINC |
| 1175907 | Influenza virus B RNA [Cycle Threshold #] in Unspecified specimen by NAA with probe detection    | LOINC |
| 1175746 | Influenza virus D RNA [Cycle Threshold #] in Unspecified specimen by NAA with probe detection    | LOINC |
| 1175657 | Influenza virus types A and B panel - Tissue by NAA with probe detection                         | LOINC |
| 1175638 | Influenza virus A subtype [Identifier] in Lower respiratory specimen by NAA with probe detection | LOINC |
| 1002397 | Influenza virus A NS1 gene [Nucleotide sequence] in Isolate by Sequencing                        | LOINC |
| 1002337 | Influenza virus A PB1 gene [Nucleotide sequence] in Isolate by Sequencing                        | LOINC |
| 1001933 | Influenza virus A PA gene [Nucleotide sequence] in Isolate by Sequencing                         | LOINC |
| 1001930 | Influenza virus A PB2 gene [Nucleotide sequence] in Isolate by Sequencing                        | LOINC |
| 1001915 | Influenza virus A NP gene [Nucleotide sequence] in Isolate by Sequencing                         | LOINC |

### Appendix 3. Definitions and codes used for obesity and other comorbidities

| Name                                  | Definition                                                                                                                                                                                                                                                                                                                                                                                                                                                                                                                                                                                                                                                                                                 | Included Codes                                                                                              |
|---------------------------------------|------------------------------------------------------------------------------------------------------------------------------------------------------------------------------------------------------------------------------------------------------------------------------------------------------------------------------------------------------------------------------------------------------------------------------------------------------------------------------------------------------------------------------------------------------------------------------------------------------------------------------------------------------------------------------------------------------------|-------------------------------------------------------------------------------------------------------------|
| Asthma                                | <p>People having any of the following:</p> <ul style="list-style-type: none"> <li>● a drug exposure of Asthma therapy <ul style="list-style-type: none"> <li>○ with age &lt; 55</li> </ul> </li> <li>● Having all of the following criteria: <ul style="list-style-type: none"> <li>○ at least 1 occurrences of a drug exposure of Asthma therapy</li> <li>○ where event starts between 365 days Before and 180 days Before index start date</li> </ul> </li> <li>● a condition occurrence of Asthma</li> <li>● an observation of Asthma</li> </ul> <p>with continuous observation of at least 0 days prior and 0 days after event index date, and limit initial events to: earliest event per person.</p> | <a href="https://atlas.ohdsi.org/#/cohortdefinition/218">https://atlas.ohdsi.org/#/cohortdefinition/218</a> |
| Autoimmune condition                  | <p>People having any of the following condition occurrence/observation:</p> <ul style="list-style-type: none"> <li>● Type 1 Diabetes Mellitus, Rheumatoid arthritis, Psoriasis, Psoriatic Arthritis, Multiple sclerosis, Systemic lupus erythematosus, Addison's disease, Graves' disease, Sjogren's syndrome, Hashimoto thyroiditis, Myasthenia gravis, Vasculitis, Pernicious anemia, Celiac disease, Scleroderma, Sarcoidosis, Ulcerative colitis, Crohn's disease</li> </ul> <p>with continuous observation of at least 0 days prior and 0 days after event index date, and limit initial events to: earliest event per person.</p>                                                                    | <a href="https://atlas.ohdsi.org/#/cohortdefinition/220">https://atlas.ohdsi.org/#/cohortdefinition/220</a> |
| Chronic kidney disease broad          | <p>People having any of the following:</p> <ul style="list-style-type: none"> <li>● a condition occurrence of Chronic kidney disease</li> </ul> <p>with continuous observation of at least 0 days prior and 0 days after event index date, and limit initial events to: earliest event per person.</p>                                                                                                                                                                                                                                                                                                                                                                                                     | <a href="https://atlas.ohdsi.org/#/cohortdefinition/312">https://atlas.ohdsi.org/#/cohortdefinition/312</a> |
| Chronic obstructive pulmonary disease | <p>People having any of the following:</p> <ul style="list-style-type: none"> <li>● a drug exposure of COPD combo-therapy <ul style="list-style-type: none"> <li>○ with age &gt;= 55</li> </ul> </li> <li>● a drug exposure of COPD mono-therapy <ul style="list-style-type: none"> <li>○ with age &gt;= 55</li> </ul> </li> <li>● a condition occurrence of Chronic obstructive lung disease</li> </ul>                                                                                                                                                                                                                                                                                                   | <a href="https://atlas.ohdsi.org/#/cohortdefinition/219">https://atlas.ohdsi.org/#/cohortdefinition/219</a> |

|                                                       |                                                                                                                                                                                                                                                                                                                                                                                                                                                                                                                                                                                                                                                                       |                                                                                                             |
|-------------------------------------------------------|-----------------------------------------------------------------------------------------------------------------------------------------------------------------------------------------------------------------------------------------------------------------------------------------------------------------------------------------------------------------------------------------------------------------------------------------------------------------------------------------------------------------------------------------------------------------------------------------------------------------------------------------------------------------------|-------------------------------------------------------------------------------------------------------------|
|                                                       | with continuous observation of at least 0 days prior and 0 days after event index date, and limit initial events to: earliest event per person.                                                                                                                                                                                                                                                                                                                                                                                                                                                                                                                       |                                                                                                             |
| Dementia                                              | <p>People having any of the following:</p> <ul style="list-style-type: none"> <li>● a condition occurrence of Dementia</li> </ul> <p>with continuous observation of at least 0 days prior and 0 days after event index date, and limit initial events to: earliest event per person.</p>                                                                                                                                                                                                                                                                                                                                                                              | <a href="https://atlas.ohdsi.org/#/cohortdefinition/226">https://atlas.ohdsi.org/#/cohortdefinition/226</a> |
| Heart disease                                         | <p>People having any of the following:</p> <ul style="list-style-type: none"> <li>● a condition occurrence of Heart disease conditions</li> </ul> <p>with continuous observation of at least 0 days prior and 0 days after event index date, and limit initial events to: earliest event per person.</p>                                                                                                                                                                                                                                                                                                                                                              | <a href="https://atlas.ohdsi.org/#/cohortdefinition/231">https://atlas.ohdsi.org/#/cohortdefinition/231</a> |
| Human immunodeficiency virus infection broad          | <p>People having any of the following:</p> <ul style="list-style-type: none"> <li>● a condition occurrence of HIV excluding HIV-II</li> </ul> <p>with continuous observation of at least 0 days prior and 0 days after event index date, and limit initial events to: earliest event per person.</p>                                                                                                                                                                                                                                                                                                                                                                  | <a href="https://atlas.ohdsi.org/#/cohortdefinition/314">https://atlas.ohdsi.org/#/cohortdefinition/314</a> |
| Hypertension                                          | <p>People having any of the following:</p> <ul style="list-style-type: none"> <li>● a condition occurrence of Hypertension</li> </ul> <p>with continuous observation of at least 0 days prior and 0 days after event index date, and limit initial events to: earliest event per person.</p>                                                                                                                                                                                                                                                                                                                                                                          | <a href="https://atlas.ohdsi.org/#/cohortdefinition/227">https://atlas.ohdsi.org/#/cohortdefinition/227</a> |
| Malignant neoplasm excluding non-melanoma skin cancer | <p>People having any of the following:</p> <ul style="list-style-type: none"> <li>● a condition occurrence of Malignant neoplasms excluding non-melanoma skin cancer</li> <li>● an observation of Malignant neoplasms excluding non-melanoma skin cancer</li> </ul> <p>with continuous observation of at least 0 days prior and 0 days after event index date, and limit initial events to: earliest event per person.</p>                                                                                                                                                                                                                                            | <a href="https://atlas.ohdsi.org/#/cohortdefinition/222">https://atlas.ohdsi.org/#/cohortdefinition/222</a> |
| Obesity                                               | <p>People having any of the following:</p> <ul style="list-style-type: none"> <li>● a measurement of BMI measurement with value as number between 30 and 60 (inclusive)</li> <li>● a condition occurrence of obesity diagnoses</li> <li>● an observation of obesity diagnoses</li> <li>● a measurement of body weight <ul style="list-style-type: none"> <li>○ with value as number between 120 and 200 (inclusive)</li> <li>○ unit is any of: kilogram</li> </ul> </li> <li>● an observation of body weight <ul style="list-style-type: none"> <li>○ with value as number between 120 and 200 (inclusive)</li> <li>○ unit is any of: kilogram</li> </ul> </li> </ul> | <a href="https://atlas.ohdsi.org/#/cohortdefinition/224">https://atlas.ohdsi.org/#/cohortdefinition/224</a> |

|           |                                                                                                                                                                                                                                                                                                                                                                                                                                                                                                                                                                                                                                                                                                                                                                                                                                                                                                                                                                                                                                                                                                                                                                                                                                                                                                                                                                                                                                                                                                                                                                                                                                                                                                                                                                                                                                                                                                                                                                                                                                                                                                                                                                                                                                                                                                                                                                                                                                                                                                                                  |                                                                                                                    |
|-----------|----------------------------------------------------------------------------------------------------------------------------------------------------------------------------------------------------------------------------------------------------------------------------------------------------------------------------------------------------------------------------------------------------------------------------------------------------------------------------------------------------------------------------------------------------------------------------------------------------------------------------------------------------------------------------------------------------------------------------------------------------------------------------------------------------------------------------------------------------------------------------------------------------------------------------------------------------------------------------------------------------------------------------------------------------------------------------------------------------------------------------------------------------------------------------------------------------------------------------------------------------------------------------------------------------------------------------------------------------------------------------------------------------------------------------------------------------------------------------------------------------------------------------------------------------------------------------------------------------------------------------------------------------------------------------------------------------------------------------------------------------------------------------------------------------------------------------------------------------------------------------------------------------------------------------------------------------------------------------------------------------------------------------------------------------------------------------------------------------------------------------------------------------------------------------------------------------------------------------------------------------------------------------------------------------------------------------------------------------------------------------------------------------------------------------------------------------------------------------------------------------------------------------------|--------------------------------------------------------------------------------------------------------------------|
|           | <p>with continuous observation of at least 0 days prior and 0 days after event index date, and limit initial events to: <b>earliest event per person.</b></p> <p>Limit qualifying cohort to: <b>earliest event per person.</b></p>                                                                                                                                                                                                                                                                                                                                                                                                                                                                                                                                                                                                                                                                                                                                                                                                                                                                                                                                                                                                                                                                                                                                                                                                                                                                                                                                                                                                                                                                                                                                                                                                                                                                                                                                                                                                                                                                                                                                                                                                                                                                                                                                                                                                                                                                                               |                                                                                                                    |
| Pregnancy | <p>People having any of the following:</p> <ul style="list-style-type: none"> <li>● a condition occurrence of Pregnancy conditions, procedures, and observations<sup>2</sup> <ul style="list-style-type: none"> <li>○ with age between 12 and 55 (inclusive)</li> <li>○ gender is any of: FEMALE</li> </ul> </li> <li>● a procedure of Pregnancy conditions, procedures, and observations <ul style="list-style-type: none"> <li>○ with age between 12 and 55 (inclusive)</li> <li>○ gender is any of: FEMALE</li> </ul> </li> <li>● an observation of Pregnancy conditions, procedures, and observations <ul style="list-style-type: none"> <li>○ with age between 12 and 55 (inclusive)</li> <li>○ gender is any of: FEMALE</li> </ul> </li> </ul> <p>with continuous observation of at least 0 days prior and 0 days after event index date, and limit initial events to: <b>all events per person.</b></p> <p><b>Inclusion rules</b></p> <p><b>Inclusion Criteria #1:</b> At least 1 outcome 1 day after or end of observation before end of pregnancy post-2020</p> <p>Having any of the following criteria:</p> <ul style="list-style-type: none"> <li>● at least 1 occurrences of a condition occurrence of Birth, Abortion, Miscarriage<sup>1</sup></li> <li>● where event starts between 1 days After and 300 days After index start date</li> <li>● or at least 1 occurrences of an observation of Birth, Abortion, Miscarriage<sup>1</sup></li> <li>● where event starts between 1 days After and 300 days After index start date</li> <li>● or at least 1 occurrences of a procedure of Birth, Abortion, Miscarriage<sup>1</sup></li> <li>● where event starts between 1 days After and all days After index start date</li> <li>● or at least 1 occurrences of an observation period <ul style="list-style-type: none"> <li>○ Having all of the following criteria: <ul style="list-style-type: none"> <li>■ with the following event criteria: <ul style="list-style-type: none"> <li>■ occurrence end is after 2020-01-01</li> </ul> </li> <li>■</li> </ul> </li> </ul> </li> <li>● where event starts between all days Before and 0 days After index start date and event ends between 0 days After and 300 days After index start date</li> </ul> <p><b>Inclusion Criteria #2:</b> No outcome in the prior 60d</p> <p>Having all of the following criteria:</p> <ul style="list-style-type: none"> <li>● exactly 0 occurrences of a condition occurrence of Birth, Abortion, Miscarriage<sup>1</sup></li> </ul> | <p><a href="https://atlas.ohdsi.org/#/cohortdefinition/233">https://atlas.ohdsi.org/#/cohortdefinition/233</a></p> |

|                          |                                                                                                                                                                                                                                                                                                                                                                                                                                                                                                                                                                                      |                                                                                                             |
|--------------------------|--------------------------------------------------------------------------------------------------------------------------------------------------------------------------------------------------------------------------------------------------------------------------------------------------------------------------------------------------------------------------------------------------------------------------------------------------------------------------------------------------------------------------------------------------------------------------------------|-------------------------------------------------------------------------------------------------------------|
|                          | <ul style="list-style-type: none"> <li>● where event starts between 60 days Before and 1 days Before index start date</li> <li>● and exactly 0 occurrences of a procedure of Birth, Abortion, Miscarriage<sup>1</sup></li> <li>● where event starts between 60 days Before and 1 days Before index start date</li> <li>● and exactly 0 occurrences of an observation of Birth, Abortion, Miscarriage<sup>1</sup></li> <li>● where event starts between 60 days Before and 1 days Before index start date</li> </ul> <p>Limit qualifying cohort to: <b>all events per person.</b></p> |                                                                                                             |
| Type 2 Diabetes Mellitus | <p>People having any of the following:</p> <ul style="list-style-type: none"> <li>● a condition occurrence of Type 2 Diabetes Mellitus</li> <li>● an observation of History of diabetes</li> </ul> <p>with continuous observation of at least 0 days prior and 0 days after event index date, and limit initial events to: earliest event per person.</p>                                                                                                                                                                                                                            | <a href="https://atlas.ohdsi.org/#/cohortdefinition/311">https://atlas.ohdsi.org/#/cohortdefinition/311</a> |

**Appendix 4. Table 3: Percentage of obese and non-obese patients diagnosed and hospitalized with COVID-19 and influenza in the season 2017-2018 by 5-year age strata**

| Age strata, %                  | CPRD  |           | SIDIAP |           | STARR-OMOP |           | CUIMC |           | IQVIA-Open Claims |           | VA-OMOP |           |
|--------------------------------|-------|-----------|--------|-----------|------------|-----------|-------|-----------|-------------------|-----------|---------|-----------|
|                                | Obese | Non-obese | Obese  | Non-obese | Obese      | Non-obese | Obese | Non-obese | Obese             | Non-obese | Obese   | Non-obese |
| <b>Diagnosed with COVID-19</b> |       |           |        |           |            |           |       |           |                   |           |         |           |
| 00-04                          | -     | 0.6       | 0.1    | 1.6       | -          | 1.2       | -     | 1.9       | 0.0               | 1.2       | -       | -         |
| 05-09                          | -     | 0.7       | 0.3    | 1.4       | -          | 0.9       | 0.3   | 0.8       | 0.2               | 1.0       | -       | 0.0       |
| 10-14                          | -     | <0.4      | 0.4    | 1.1       | -          | 1.0       | 0.5   | 0.5       | 0.4               | 0.9       | -       | 0.0       |
| 15-19                          | -     | 0.6       | 0.7    | 1.5       | -          | 3.2       | 0.7   | 0.7       | 0.9               | 1.6       | -       | -         |
| 20-24                          | 0.6   | 1.8       | 2.1    | 4.2       | 1.7        | 4.3       | 1.6   | 1.5       | 2.2               | 3.5       | 0.0     | 0.6       |
| 25-29                          | 2.3   | 2.9       | 3.1    | 6.4       | 2.5        | 5.3       | 3.4   | 6.8       | 3.7               | 4.9       | 0.7     | 3.5       |
| 30-34                          | 3.5   | 4.2       | 3.9    | 7.4       | 5.8        | 5.7       | 6.3   | 10.3      | 5.1               | 5.6       | 2.7     | 7.4       |
| 35-39                          | 3.8   | 5.4       | 6.3    | 9.4       | 7.3        | 6.4       | 7.9   | 8.9       | 6.2               | 5.7       | 4.7     | 7.5       |
| 40-44                          | 5.4   | 5.3       | 8.2    | 11.8      | 7.3        | 6.3       | 7.5   | 7.7       | 7.1               | 5.9       | 5.1     | 6.1       |
| 45-49                          | 7.2   | 6.6       | 8.8    | 11.3      | 7.4        | 6.3       | 7.3   | 7.2       | 8.6               | 6.4       | 5.9     | 5.9       |
| 50-54                          | 9.7   | 8.8       | 9.0    | 9.7       | 8.8        | 9.3       | 9.1   | 7.8       | 10.3              | 7.6       | 9.3     | 7.9       |
| 55-59                          | 12.1  | 8.5       | 9.2    | 8.3       | 12.4       | 10.2      | 9.5   | 8.3       | 11.6              | 8.6       | 11.2    | 8.7       |



|                                   |      |     |     |     |      |     |      |     |      |      |      |      |
|-----------------------------------|------|-----|-----|-----|------|-----|------|-----|------|------|------|------|
| 60-64                             | 10.7 | 6.8 | 8.0 | 6.3 | 11.1 | 9.8 | 10.2 | 8.4 | 11.2 | 8.9  | 14.0 | 11.0 |
| 65-69                             | 6.6  | 4.6 | 6.0 | 3.5 | 11.8 | 9.0 | 9.8  | 6.6 | 9.3  | 7.7  | 12.6 | 8.8  |
| 70-74                             | 9.3  | 5.4 | 6.5 | 3.0 | 10.4 | 8.8 | 8.9  | 5.7 | 7.9  | 6.9  | 17.9 | 12.9 |
| 75-79                             | 8.8  | 6.9 | 6.8 | 2.8 | 7.1  | 6.4 | 6.0  | 5.2 | 6.0  | 6.1  | 8.6  | 7.4  |
| 80-84                             | 9.8  | 8.8 | 6.5 | 2.8 | 3.5  | 3.8 | 5.0  | 4.5 | 4.3  | 5.6  | 3.4  | 3.9  |
| 85-89                             | 5.7  | 9.6 | 7.6 | 3.4 | 1.5  | 1.9 | 3.3  | 3.6 | 5.0  | 11.7 | 2.4  | 4.3  |
| 90-94                             | 3.3  | 8.2 | 4.9 | 2.8 | -    | -   | 2.0  | 2.7 | -    | -    | 1.2  | 2.7  |
| 95-99                             | 1.1  | 3.4 | 1.5 | 1.2 | -    | -   | 0.5  | 0.8 | -    | -    | 0.3  | 1.3  |
| <b>Hospitalized with COVID-19</b> |      |     |     |     |      |     |      |     |      |      |      |      |
| 00-04                             | -    | -   | 0.0 | 0.2 | -    | 4.7 | -    | 3.4 | 0.0  | 0.9  | -    | -    |
| 05-09                             | -    | -   | 0.0 | 0.1 | -    | -   | -    | 1.3 | 0.2  | 0.5  | -    | -    |
| 10-14                             | -    | -   | -   | 0.1 | -    | -   | 0.6  | 1   | 0.1  | 0.3  | -    | -    |
| 15-19                             | -    | -   | 0.1 | 0.4 | -    | 3.2 | 0.9  | 1.2 | 0.4  | 0.5  | -    | -    |
| 20-24                             | -    | -   | 0.5 | 0.8 | -    | -   | 1.9  | 0.8 | 1.0  | 1.0  | -    | 0.2  |
| 25-29                             | -    | -   | 0.9 | 1.4 | 4.0  | 3.2 | 3.4  | 1.3 | 1.7  | 1.5  | -    | 0.7  |
| 30-34                             | -    | -   | 1.4 | 2.3 | 6.9  | 2.9 | 4.0  | 2.0 | 2.5  | 2.0  | 0.8  | 1.4  |

|                                     |     |     |      |      |      |      |      |      |      |      |      |      |
|-------------------------------------|-----|-----|------|------|------|------|------|------|------|------|------|------|
| 35-39                               | -   | -   | 2.3  | 3.1  | 5.1  | 3.8  | 4.3  | 2.5  | 3.4  | 2.5  | 1.7  | 2.0  |
| 40-44                               | -   | -   | 3.7  | 6.0  | 5.5  | 5.0  | 3.7  | 2.3  | 4.3  | 2.9  | 2.2  | 1.9  |
| 45-49                               | -   | -   | 4.8  | 7.3  | 6.2  | 4.7  | 4.8  | 3.7  | 6.0  | 4.0  | 3.0  | 2.5  |
| 50-54                               | -   | -   | 7.1  | 8.5  | 7.3  | 6.2  | 6.5  | 5.1  | 8.3  | 5.8  | 6.6  | 3.4  |
| 55-59                               | -   | -   | 8.4  | 10.3 | 13.1 | 10.3 | 7.9  | 7.6  | 11.1 | 8.2  | 9.1  | 5.0  |
| 60-64                               | -   | -   | 8.8  | 10.1 | 12.0 | 11.1 | 9.7  | 8.6  | 13.0 | 10.6 | 13.6 | 10.4 |
| 65-69                               | -   | -   | 9.8  | 8.2  | 10.9 | 12.9 | 12.5 | 10.4 | 12.4 | 10.9 | 15.0 | 11.8 |
| 70-74                               | -   | -   | 12.2 | 8.8  | 11.7 | 14.1 | 11.2 | 10.0 | 11.9 | 11.3 | 23.0 | 19.9 |
| 75-79                               | -   | -   | 12.9 | 9.7  | 8.0  | 8.8  | 8.9  | 11.6 | 9.6  | 10.5 | 12.5 | 13.1 |
| 80-84                               | -   | -   | 11.2 | 8.4  | 4.0  | 4.1  | 8.3  | 10.2 | 7.0  | 9.6  | 5.3  | 7.6  |
| 85-89                               | -   | -   | 10.1 | 8.0  | -    | -    | 6.5  | 7.6  | 7.1  | 17.0 | 3.7  | 9.8  |
| 90-94                               | -   | -   | 4.7  | 4.7  | -    | -    | 3.7  | 6.9  | -    | -    | 2.5  | 6.8  |
| 95-99                               | -   | -   | 1    | 1.5  | -    | -    | 0.9  | 2.2  | -    | -    | 0.8  | 3.4  |
| <b>Diagnosed with<br/>Influenza</b> |     |     |      |      |      |      |      |      |      |      |      |      |
| 00-04                               | -   | 3.5 | 1.1  | 6.1  | -    | 12.4 | 2.1  | 15.3 | 0.5  | 12.1 | -    | 0.0  |
| 05-09                               | 0.0 | 2.2 | 3.4  | 9.8  | 2.4  | 22.3 | 5.0  | 19.8 | 3.4  | 18.2 | -    | 0.0  |
| 10-14                               | 0.0 | 3.0 | 4.2  | 7.5  | 4.3  | 17.2 | 4.5  | 9.1  | 5.3  | 12.3 | -    | 0.0  |

|       |      |     |      |      |     |      |     |     |     |     |      |      |
|-------|------|-----|------|------|-----|------|-----|-----|-----|-----|------|------|
| 15-19 | -    | 4.3 | 2.4  | 4.7  | 5.1 | 10.1 | 3.1 | 5.0 | 4.8 | 8.1 | -    | 0.0  |
| 20-24 | 1.1  | 4.2 | 2.5  | 4.4  | 2.1 | 3.4  | 3.3 | 2.9 | 3.8 | 4.6 | 0.1  | 0.5  |
| 25-29 | 2.3  | 3.8 | 2.7  | 4.9  | 3.2 | 1.9  | 4.1 | 2.9 | 4.8 | 4.0 | 0.9  | 3.8  |
| 30-34 | 3.5  | 5.2 | 4.7  | 6.7  | 5.0 | 2.0  | 4.7 | 3.4 | 6.1 | 4.1 | 2.9  | 6.5  |
| 35-39 | 4.0  | 7.2 | 8.3  | 9.7  | 6.4 | 3.2  | 4.7 | 4.1 | 7.4 | 4.3 | 4.1  | 6.1  |
| 40-44 | 4.7  | 5.3 | 10.6 | 11.4 | 8.9 | 2.9  | 4.8 | 3.1 | 7.8 | 4.1 | 4.2  | 4.7  |
| 45-49 | 7.3  | 5.9 | 10.0 | 9.2  | 9.2 | 3.9  | 6.4 | 3.7 | 8.5 | 4.1 | 7.0  | 5.6  |
| 50-54 | 9.8  | 6.9 | 10.1 | 7.8  | 8.7 | 3.8  | 6.3 | 3.5 | 8.9 | 4.1 | 8.5  | 6.2  |
| 55-59 | 9.0  | 6.9 | 9.8  | 6.3  | 7.9 | 3.3  | 9.0 | 4.0 | 9.3 | 4.2 | 11.1 | 9.7  |
| 60-64 | 9.0  | 6.9 | 8.5  | 4.5  | 9.3 | 2.7  | 8.4 | 4.1 | 8.3 | 3.8 | 13.8 | 11.6 |
| 65-69 | 8.9  | 5.0 | 6.3  | 2.3  | 7.5 | 2.9  | 8.0 | 4.0 | 7.0 | 3.2 | 15.7 | 13.0 |
| 70-74 | 9.5  | 6.7 | 5.7  | 1.8  | 8.0 | 3.0  | 8.0 | 3.2 | 5.9 | 2.6 | 17.8 | 13.7 |
| 75-79 | 11.4 | 5.9 | 3.8  | 1.0  | 5.2 | 2.1  | 5.5 | 3.5 | 3.8 | 2.0 | 6.7  | 5.9  |
| 80-84 | 10.7 | 6.1 | 3.0  | 0.8  | 3.6 | 1.3  | 4.4 | 2.9 | 4.6 | 4.2 | 3.6  | 4.5  |
| 85-89 | 4.3  | 6.4 | 2.0  | 0.6  | 2.5 | 1.5  | 4.9 | 2.7 | -   | -   | 2.3  | 4.2  |
| 90-94 | 3.4  | 3.4 | 0.8  | 0.3  | -   | 0.2  | 1.8 | 1.9 | -   | -   | 1.1  | 2.8  |
| 95-99 | 1.0  | 1.2 | 0.2  | 0.1  | -   | -    | 0.8 | 0.6 | -   | -   | 0.3  | 1.0  |

| <b>Hospitalized with Influenza</b> |   |   |   |   |   |   |      |      |      |      |      |      |  |
|------------------------------------|---|---|---|---|---|---|------|------|------|------|------|------|--|
| 00-04                              | - | - | - | - | - | - | -    | 11.5 | 0.2  | 3.8  | -    | -    |  |
| 05-09                              | - | - | - | - | - | - | -    | 7.9  | 0.5  | 3.1  | -    | -    |  |
| 10-14                              | - | - | - | - | - | - | -    | 4.7  | 0.7  | 1.7  | -    | -    |  |
| 15-19                              | - | - | - | - | - | - | 2.8  | 2.7  | 0.8  | 1.6  | -    | -    |  |
| 20-24                              | - | - | - | - | - | - | 3.1  | 3.0  | 1.3  | 1.8  | -    | -    |  |
| 25-29                              | - | - | - | - | - | - | 3.1  | 1.6  | 1.8  | 1.9  | 0.2  | 0.5  |  |
| 30-34                              | - | - | - | - | - | - | 2.4  | 3.0  | 2.4  | 1.9  | 0.5  | 1.1  |  |
| 35-39                              | - | - | - | - | - | - | 2.1  | 2.2  | 2.7  | 1.9  | 0.7  | 0.9  |  |
| 40-44                              | - | - | - | - | - | - | 2.4  | 1.6  | 3.5  | 2.0  | 1.1  | 0.9  |  |
| 45-49                              | - | - | - | - | - | - | 3.8  | 2.5  | 4.5  | 2.6  | 2.2  | 1.4  |  |
| 50-54                              | - | - | - | - | - | - | 4.1  | 4.4  | 6.5  | 3.9  | 3.5  | 2.6  |  |
| 55-59                              | - | - | - | - | - | - | 6.9  | 5.5  | 9.3  | 5.8  | 6.9  | 6.5  |  |
| 60-64                              | - | - | - | - | - | - | 9.7  | 5.8  | 11.1 | 7.2  | 12.8 | 11.5 |  |
| 65-69                              | - | - | - | - | - | - | 8.3  | 6.3  | 12.2 | 8.6  | 20.0 | 16.7 |  |
| 70-74                              | - | - | - | - | - | - | 9.3  | 6.8  | 13.2 | 9.8  | 24.9 | 19.1 |  |
| 75-79                              | - | - | - | - | - | - | 10.0 | 6.0  | 11.3 | 10.3 | 11.1 | 10.4 |  |

|       |   |   |   |   |   |   |      |     |      |      |     |     |
|-------|---|---|---|---|---|---|------|-----|------|------|-----|-----|
| 80-84 | - | - | - | - | - | - | 10.0 | 6.0 | 17.9 | 32.2 | 7.6 | 8.1 |
| 85-89 | - | - | - | - | - | - | 10.7 | 8.2 | -    | -    | 4.9 | 9.4 |
| 90-94 | - | - | - | - | - | - | 4.5  | 7.1 | -    | -    | 2.8 | 7.6 |
| 95-99 | - | - | - | - | - | - | 2.4  | 1.9 | -    | -    | 0.8 | 2.8 |

Notes: - data not available or below the minimum cell count required (5 individuals)

Abbreviations: COVID-19: Coronavirus Disease 2019; CPRD: Clinical Practice Research Datalink; CUIMC: Columbia University Irving Medical Center; SIDIAP: Information System For Research in Primary Care; STARR-OMOP: Stanford Medicine Research Data Repository; VA-OMOP: United States Department of Veterans Affairs.

**Appendix 5. Table 4: Comorbidities and main outcomes among obese and non-obese patients diagnosed with COVID-19.**

| Comorbidities                 | CPRD  |           | SIDIAP |           | STARR-OMOP |           | CUIMC |           | IQVIA-OpenClaims |           | VA-OMOP |           |
|-------------------------------|-------|-----------|--------|-----------|------------|-----------|-------|-----------|------------------|-----------|---------|-----------|
|                               | Obese | Non-obese | Obese  | Non-obese | Obese      | Non-obese | Obese | Non-obese | Obese            | Non-obese | Obese   | Non-obese |
| n                             | 976   | 1,360     | 36,409 | 854,649   | 1,157      | 2,171     | 3,446 | 5,073     | 154,325          | 311,866   | 11,546  | 13,066    |
| <b>Respiratory, %</b>         |       |           |        |           |            |           |       |           |                  |           |         |           |
| Apnea                         | -     | -         | 7.5    | 1.5       | 20.3       | 6.7       | 7.1   | 1.1       | 12.4             | 2.6       | 37.5    | 11.7      |
| Asthma                        | 20.6  | 10.4      | 7.4    | 5.6       | 19.5       | 10.8      | 22.1  | 10.9      | 25.5             | 14.5      | 16.0    | 8.3       |
| COPD                          | 10.1  | 6.5       | 22.2   | 8.7       | 8.6        | 4.8       | 12.8  | 6.0       | 15.7             | 13.7      | 30.8    | 22.6      |
| Idiopathic pulmonary fibrosis | -     | -         | 0.1    | 0.0       | <0.9       | <0.5      | 0.3   | <0.1      | 0.1              | 0.1       | 0.2     | 0.1       |
| <b>Metabolic, %</b>           |       |           |        |           |            |           |       |           |                  |           |         |           |
| Type 2 Diabetes               | 27.7  | 7.0       | 17.7   | 4.0       | 26.6       | 8.9       | 34.8  | 13.3      | 49.8             | 29.3      | 53.6    | 23.0      |
| Hyperlipidemia                | -     | -         | 22.2   | 11.6      | 36.2       | 19.7      | 26.6  | 11.2      | 36.6             | 22.6      | 56.8    | 34.9      |
| <b>Cardiovascular, %</b>      |       |           |        |           |            |           |       |           |                  |           |         |           |
| Atrial fibrillation           | -     | -         | 7.8    | 2.6       | 7.5        | 4.5       | 6.8   | 2.5       | 7.4              | 5.9       | 10.9    | 7.3       |
| Cerebrovascular disease       | 1.3   | 1.4       | 2.0    | 1.0       | 3.1        | 2.4       | 4.5   | 2.3       | 5.3              | 4.3       | 5.4     | 3.8       |
| Heart disease                 | 25.7  | 16.2      | 24.1   | 10.3      | 36.0       | 22.2      | 49.1  | 25.8      | 54.9             | 41.5      | 59.5    | 39.8      |
| Heart failure                 | -     | -         | 6.0    | 1.5       | 7.1        | 3.1       | 8.4   | 2.9       | 12.1             | 7.5       | 12.7    | 6.7       |
| Hypertension                  | 31.7  | 15.7      | 29.7   | 11.8      | 54.6       | 25.7      | 61.5  | 29.8      | 73.1             | 52.2      | 80.6    | 53.3      |
| Ischemic heart disease        | -     | -         | 5.8    | 2.2       | 4.8        | 2.8       | 5.5   | 2.1       | 6.1              | 4.1       | 10.1    | 6.1       |
| Peripheral vascular disease   | -     | -         | 2.8    | 1.2       | 3.2        | 1.6       | 4.1   | 1.8       | 8.5              | 5.5       | 8.1     | 5.2       |

|                                        |      |      |      |      |      |      |      |      |      |      |      |      |
|----------------------------------------|------|------|------|------|------|------|------|------|------|------|------|------|
| <b>Mental health and neurologic, %</b> |      |      |      |      |      |      |      |      |      |      |      |      |
| Anxiety                                | -    | -    | 31.6 | 26.2 | 16.3 | 9.4  | 9.8  | 5    | 13.3 | 9.5  | 37.2 | 28   |
| Dementia                               | 6.6  | 8.5  | 7.1  | 4.0  | 1.3  | 0.7  | 6.9  | 4.5  | 8.3  | 14   | 8.7  | 9.3  |
| Depression                             | 5.3  | 4.0  | 6.5  | 4.7  | 15.1 | 7.1  | 14.8 | 5.2  | 12.5 | 8.0  | 26.8 | 20.3 |
| <b>Others, %</b>                       |      |      |      |      |      |      |      |      |      |      |      |      |
| Anemia                                 | -    | -    | 15.9 | 10.0 | 16.9 | 11.1 | 13.5 | 6.3  | 18.2 | 13.8 | 17.8 | 13.7 |
| Autoimmune condition                   | 14.7 | 9.9  | 9.4  | 5.6  | 15.8 | 10.1 | 23.7 | 10.5 | 30.2 | 18.5 | 27.8 | 14.7 |
| Chronic kidney disease                 | 17.3 | 10.6 | 12.0 | 4.4  | 18.3 | 7.4  | 20.3 | 8.3  | 23.1 | 16.0 | 26.8 | 16.2 |
| Chronic liver disease                  | -    | -    | 1.4  | 1.0  | 4.8  | 2.0  | 1.8  | 0.9  | 1.4  | 1.0  | 4.9  | 3.9  |
| History of cancer                      | 9.9  | 8.2  | 10.1 | 6.0  | 28.3 | 22.2 | 22.1 | 13.0 | 17.0 | 14.9 | 24.8 | 20.1 |
| Pregnancy                              | 0.9  | 0.6  | 0.7  | 0.6  | 1.6  | 1.6  | 6.7  | 3.1  | 2.5  | 1.9  | 0.2  | 0.2  |
| Human immunodeficiency virus infection | -    | -    | 0.0  | 0.1  | -    | 0.6  | 1.8  | 1.1  | 1.0  | 1.0  | 1.3  | 1.9  |
| <b>Outcomes, %</b>                     |      |      |      |      |      |      |      |      |      |      |      |      |
| Death                                  | 12.3 | 11.3 | 7.1  | 3.3  | -    | -    | 8.0  | 5.0  | -    | -    | 5.1  | 4.8  |
| Hospitalization episodes               | -    | -    | 20.3 | 10.3 | 22.1 | 15.8 | 36.4 | 20.2 | 32.1 | 25.8 | 16.6 | 12.8 |

Notes: - data not available or below the minimum cell count required (5 individuals)

Abbreviations: CPRD, Clinical Practice Research Datalink, SIDIAP, Information System for Research in Primary Care, STARR-OMOP, Stanford Medicine Research Data Repository, CUIMC, Columbia University Irving Medical Center, VA-OMOP, United States Department of Veterans Affairs

**Appendix 6. Table 5: Comorbidities and main outcomes among obese and non-obese patients hospitalized with COVID-19**

| Comorbidities                 | SIDIAP |           | STARR-OMOP |           | CUIMC |           | IQVIA Open Claims |           | VA-OMOP |           |
|-------------------------------|--------|-----------|------------|-----------|-------|-----------|-------------------|-----------|---------|-----------|
|                               | Obese  | Non-obese | Obese      | Non-obese | Obese | Non-obese | Obese             | Non-obese | Obese   | Non-obese |
| <b>n</b>                      | 8,403  | 9,794     | 274        | 341       | 1,408 | 1,192     | 50,863            | 82,228    | 2,918   | 2,592     |
| <b>Respiratory, %</b>         |        |           |            |           |       |           |                   |           |         |           |
| Apnea                         | 10.8   | 3.0       | 28.5       | 11.4      | 6.2   | 1.4       | 15.7              | 3.4       | 38.7    | 11.5      |
| Asthma                        | 6.3    | 4.3       | 21.5       | 13.5      | 22.3  | 13.3      | 24.3              | 12.7      | 14.2    | 7.3       |
| COPD                          | 33.2   | 20.8      | 12.8       | 9.1       | 18.7  | 13.9      | 23.4              | 22.5      | 43.9    | 41.4      |
| Idiopathic pulmonary fibrosis | 0.1    | 0.1       | -          | -         | 0.5   | -         | 0.2               | 0.1       | 0.2     | -         |
| <b>Metabolic, %</b>           |        |           |            |           |       |           |                   |           |         |           |
| Type 2 Diabetes               | 26.1   | 10.7      | 29.2       | 12.0      | 47.7  | 30.9      | 64.0              | 44.9      | 67.8    | 42.1      |
| Hyperlipidemia                | 28.6   | 21.0      | 43.8       | 32.6      | 29.8  | 19.0      | 42.8              | 29.3      | 62.6    | 48.8      |
| <b>Cardiovascular, %</b>      |        |           |            |           |       |           |                   |           |         |           |
| Atrial fibrillation           | 11.2   | 6.4       | 11.3       | 6.7       | 9.0   | 5.5       | 12.2              | 10.4      | 17.3    | 14.3      |
| Cerebrovascular disease       | 2.6    | 2.3       | 5.5        | 6.5       | 5.6   | 3.7       | 8.2               | 7.4       | 8.4     | 7.3       |
| Heart disease                 | 34.7   | 22.3      | 44.5       | 35.8      | 59.0  | 43.2      | 69.8              | 59.8      | 74.4    | 65.4      |
| Heart failure                 | 9.2    | 4.0       | 12.0       | 6.5       | 13.5  | 6.9       | 21.5              | 14.7      | 22.8    | 16.9      |
| Hypertension                  | 36.9   | 23.9      | 60.9       | 43.1      | 72.0  | 56.0      | 86.2              | 73        | 91.0    | 81.1      |
| Ischemic heart disease        | 9.1    | 6.3       | 7.7        | 5.3       | 8.8   | 5.5       | 10.9              | 8.4       | 16.4    | 13.2      |
| Peripheral vascular disease   | 4.8    | 3.5       | 3.6        | -         | 5.8   | 4.0       | 13.3              | 9.7       | 14.4    | 11.8      |



|                                           |      |      |      |      |      |      |      |      |      |      |
|-------------------------------------------|------|------|------|------|------|------|------|------|------|------|
| <b>Mental health and neurologic, %</b>    |      |      |      |      |      |      |      |      |      |      |
| Anxiety                                   | 26.7 | 22   | 21.2 | 17.6 | 8.7  | 3.7  | 12.9 | 9.5  | 34.3 | 27.4 |
| Dementia                                  | 6.3  | 5.8  | -    | -    | 12.9 | 14.8 | 11.7 | 19.9 | 16.3 | 24.2 |
| Depression                                | 5.9  | 5.0  | 18.2 | 11.4 | 17.0 | 7.1  | 12.7 | 8.4  | 23.2 | 19.4 |
| <b>Others, %</b>                          |      |      |      |      |      |      |      |      |      |      |
| Anemia                                    | 17.6 | 13.4 | 25.5 | 22.3 | 16.8 | 12.1 | 25.1 | 22.0 | 28.2 | 29.1 |
| Autoimmune condition                      | 11.0 | 7.8  | 17.2 | 9.4  | 27.2 | 13.8 | 37.7 | 24.9 | 36.8 | 24.7 |
| Chronic kidney disease                    | 18.0 | 11.6 | 27.4 | 13.8 | 30   | 18.3 | 37.2 | 29.4 | 42.1 | 33.7 |
| Chronic liver disease                     | 1.7  | 2.0  | 5.8  | 2.9  | 2.9  | 2.4  | 2.2  | 2.0  | 7.8  | 8.0  |
| History of cancer                         | 14.6 | 13.7 | 33.6 | 41.1 | 23.2 | 19   | 22.4 | 21.9 | 32.4 | 33.3 |
| Pregnancy                                 | 0.6  | 0.7  | -    | -    | 7.2  | 2.9  | 1.9  | 1.6  | -    | -    |
| Human immunodeficiency virus infection    | -    | 0.1  | -    | -    | 1.6  | 2.2  | 1.3  | 1.4  | 1.5  | 2.6  |
| <b>Outcomes, %</b>                        |      |      |      |      |      |      |      |      |      |      |
| Death                                     | 13.9 | 10.9 | -    | -    | 19.5 | 20.6 | -    | -    | 15.9 | 18.4 |
| Intensive services during hospitalization | -    | -    | 9.1  | 6.2  | 2.3  | 2.0  | 13.0 | 9.7  | 21.9 | 14.5 |

Notes: - data not available or below the minimum cell count required (5 individuals)

Abbreviations: SIDIAP, Information System for Research in Primary Care, STARR-OMOP, Stanford Medicine Research Data Repository, CUIMC, Columbia University Irving Medical Center, VA-OMOP, United States Department of Veterans Affairs

**Appendix 7. Table 6: Comorbidities among obese patients with influenza during the season 2017-2018**

| Comorbidities                 | All patients diagnosed |        |            |       |                   |         | Patients hospitalized with Influenza |                  |         |
|-------------------------------|------------------------|--------|------------|-------|-------------------|---------|--------------------------------------|------------------|---------|
|                               | CPRD                   | SIDIAP | STARR-OMOP | CUIMC | IQVIA-Open Claims | VA-OMOP | CUIMC                                | IQVIA-OpenClaims | VA-OMOP |
| n                             | 835                    | 21,984 | 884        | 1,194 | 645,264           | 18,392  | 290                                  | 62,494           | 4,473   |
| <b>Respiratory, %</b>         |                        |        |            |       |                   |         |                                      |                  |         |
| Apnea                         | -                      | 5.1    | 12.7       | 8.5   | 12.4              | 35.4    | 11.0                                 | 22.5             | 38.8    |
| Asthma                        | 21.2                   | 7.4    | 26.9       | 32.7  | 28.1              | 16.6    | 33.8                                 | 29.2             | 14.1    |
| COPD                          | 12.3                   | 1.01   | 6.0        | 14.7  | 10.7              | 36.3    | 30.7                                 | 33.2             | 58.7    |
| Idiopathic pulmonary fibrosis | -                      | 0.0    | 0.6        | -     | 0.1               | 0.2     | -                                    | 0.3              | 0.4     |
| <b>Metabolic, %</b>           |                        |        |            |       |                   |         |                                      |                  |         |
| Type 2 Diabetes               | 26.3                   | 10.6   | 24.1       | 36.0  | 30.5              | 52.8    | 60.0                                 | 62.5             | 69.3    |
| Hyperlipidemia                | -                      | 18.0   | 31.8       | 27.4  | 29.9              | 57.7    | 38.6                                 | 47.5             | 65.3    |
| <b>Cardiovascular, %</b>      |                        |        |            |       |                   |         |                                      |                  |         |
| Atrial fibrillation           | -                      | 3.1    | 4.5        | 9.8   | 4.6               | 11.2    | 22.8                                 | 18.5             | 23.0    |
| Cerebrovascular disease       | 1.3                    | 1.2    | 1.8        | 4.4   | 2.9               | 4.9     | 8.3                                  | 9.7              | 8.3     |
| Heart disease                 | 25.7                   | 13     | 29.6       | 53.3  | 36.1              | 60.4    | 80.3                                 | 75.1             | 82.1    |
| Heart failure                 | -                      | 2.2    | 5.7        | 11.9  | 5.8               | 13.4    | 31.7                                 | 28               | 30.6    |
| Hypertension                  | 31.6                   | 22.9   | 46.6       | 60.3  | 56.4              | 81.5    | 81.7                                 | 87.6             | 93.5    |
| Ischemic heart disease        | -                      | 3.4    | 3.2        | 6.4   | 3.9               | 11.7    | 15.9                                 | 13.8             | 20.8    |
| Peripheral vascular disease   | -                      | 1.1    | 1.8        | 4.0   | 3.3               | 6.9     | 8.3                                  | 12               | 13.8    |

|                                           |      |      |      |      |      |      |      |      |      |
|-------------------------------------------|------|------|------|------|------|------|------|------|------|
| <b>Mental health and neurologic, %</b>    |      |      |      |      |      |      |      |      |      |
| Anxiety                                   | -    | 27.5 | 12.2 | 10.4 | 14.5 | 32.9 | 10.7 | 17.7 | 32.1 |
| Dementia                                  | 3.0  | 0.7  | 1.1  | 7.0  | 2    | 5.7  | 17.2 | 8.6  | 12.7 |
| Depression                                | 5.5  | 5.2  | 11.4 | 16.3 | 12.6 | 24.0 | 16.6 | 15.3 | 19.8 |
| <b>Others, %</b>                          |      |      |      |      |      |      |      |      |      |
| Anemia                                    | -    | 9.9  | 11.1 | 17.4 | 9.8  | 15.2 | 29   | 25.9 | 28.1 |
| Autoimmune condition                      | 17.4 | 6.8  | 13.5 | 25.6 | 19.6 | 28.1 | 37.9 | 40.2 | 39.4 |
| Chronic kidney disease                    | 19.2 | 4.6  | 14.1 | 23.5 | 11.9 | 25.0 | 44.8 | 39   | 43.3 |
| Chronic liver disease                     | -    | 0.9  | 1.8  | 2.8  | 0.9  | 4.4  | 3.4  | 2.6  | 7.5  |
| History of cancer                         | 10.9 | 5.9  | 16.4 | 23.8 | 11.8 | 25.6 | 34.1 | 25.4 | 39.5 |
| Pregnancy                                 | 0.8  | 0.2  | 2.7  | 3.2  | 2.3  | 0.1  | 3.4  | 2.3  | -    |
| Human immunodeficiency virus infection    | -    |      | 0.6  | 3.7  | 0.4  | 0.8  | 3.8  | 0.9  | 0.9  |
| <b>Outcomes, %</b>                        |      |      |      |      |      |      |      |      |      |
| Death                                     | 2.5  | 0.1  | -    | 0.8  | -    | 1.2  | 2.4  | -    | 3.8  |
| Hospitalization episodes                  | -    | -    | 9.0  | 17.6 | 9.4  | 13.5 | NA   | NA   | NA   |
| Intensive services during hospitalization | -    | -    | -    | -    | -    | -    | 5.9  | 3.2  | 6.3  |

Notes: - data not available or below the minimum cell count required (5 individuals), NA: not applicable

Abbreviations: CPRD, Clinical Practice Research Datalink, SIDIAP, Information System For Research in Primary Care, STARR-OMOP, Stanford Medicine Research Data Repository, CUIMC, Columbia University Irving Medical Center, VA-OMOP, United States Department of Veterans Affairs
